# Supplementary material
Source: publisher figshare collection journal article supplement (https://tandf.figshare.com/ndownloader/files/20467323)
Supplement: Supplementary file 1 [file 20467323]

**Supporting Information**

## **Synthesis of novel ultraviolet stabilizers based on [60]fullerene and their effects on photo-oxidative degradation of polystyrene**

**Lipengcheng Xiaoa, Yang Zhaoa, Bo Jin*a, Qingchun Zhanga, Zuohu Chaia, Rufang Peng* a**

***a****State Key Laboratory of Environmental Friendly Energy Materials, Southwest University of Science and Technology, Mianyang 621010, Sichuan, P. R. China.*

*E-mail:* *jinbo0428@163.com;* *pengrufang@swust.edu.cn;*

*Tel: +86-0816-2419011*

**Table of Contents**

[General Procedure for the Synthesis of [60]fullereropyrroline](../../../../C:%5CUsers%5C2016-pc%5CDesktop%5CSupporting%20Information%20(%E6%81%A2%E5%A4%8D).docx" \l "__RefHeading___Toc487445713) **2a-b** S1-3

[1](../../../../C:%5CUsers%5C2016-pc%5CDesktop%5CSupporting%20Information%20(%E6%81%A2%E5%A4%8D).docx" \l "__RefHeading___Toc487445718)H NMR spectra and 13C NMR spectra of compounds **2a-b** S3-8

HRMS of compounds **2a-b**S8-9

HPLCof compounds **2a-b** S9-10

Water contact angle measurementof films S10-11

**General** **Procedure for the Synthesis of [60]****fullereropyrroline 2a-b.**

C60 (36.0 mg, 0.05 mmol), *N*-Benzylglycine (49.5 mg, 0.30 mmol), *p*-anisaldehyde (**1a**) (27.2 mg, 0.20 mmol) or 4-ethoxybenzaldehyde (**1b**) (30.0 mg, 0.20 mmol) and chlorobenzene (10 mL) were added into a 100 mL thick-walled glass bottle with a magnetic stirring bar. The reaction was stirred at 130 °C for 5 h with reflux. After the reaction was completed, the reaction solution was evaporated under vacuum, and the residue was chromatographed on a silica gel column eluting with CS2. The first purple band was unreacted C60, and the second brown band was eluted with toluene/hexane (1:1 v/v) to afford the desired product **2a-b**.


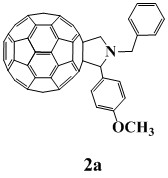


**Synthesis of 2a.** The product was purified by silica gel chromatography (toluene: hexane = 1:1) to afford **2a** (15.7 mg, 33%) as a brown amorphous solid and unreacted C60 (13.7 mg, 38%). 1H NMR (600 MHz, CDCl3/CS2 (3:1 v/v)) δ 7.60 (d, *J* = 7.4 Hz, 4H), 7.41 (t, *J* = 7.6 Hz, 2H), 7.31 (t, *J* = 7.4 Hz, 1H), 6.91 (d, *J* = 8.2 Hz, 2H), 5.12 (s, 1H), 4.81 (d, *J* = 9.4 Hz, 1H), 4.52 (d, *J* = 13.3 Hz, 1H), 4.10 (d, *J* = 9.4 Hz, 1H), 3.77 (s, 3H), 3.59 (d, *J* = 13.3 Hz, 1H). 13C NMR (150 MHz, CDCl3/CS2 (3:1 v/v)) δ 159.49, 156.11, 153.75, 153.28, 153.25, 147.05, 147.04, 146.56, 146.20, 146.12, 146.08, 146.04, 145.97, 145.94, 145.90, 145.86, 145.70, 145.70, 145.54, 145.34, 145.30, 145.26, 145.21, 145.18, 145.06, 145.02, 145.00, 144.90, 144.48, 144.44, 144.17, 144.14, 142.93, 142.77, 142.46, 142.39, 142.35, 142.33, 142.12, 142.03, 141.93, 141.90, 141.88, 141.80, 141.78, 141.73, 141.62, 141.43, 141.35, 139.97, 139.96, 139.77, 139.38, 137.61, 136.61, 136.31, 135.67, 135.54, 130.26, 128.59, 128.57, 128.50, 127.40, 114.03, 80.83(sp3-C of C60), 76.58(sp3-C of C60), 68.30, 66.43, 56.61, 54.74. UV−vis (toluene) λ/(nm): 287, 332, 433. HRMS (MALDI-TOF) *m/z* calcd for C76H17NO [M + H]+ 959.1305, found 959.1309.


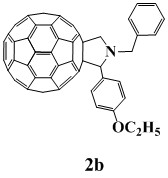


**Synthesis of 2b.** The product was purified by silica gel chromatography (toluene: hexane = 1:1) to afford 2b (19.3 mg, 39%) as a brown amorphous solid and unreacted C60 (11.9 mg, 33%). 1H NMR (600 MHz, CDCl3/CS2 (3:1 v/v)) δ 7.61 (d, *J* = 7.3 Hz, 4H), 7.42 (t, *J* = 7.6 Hz, 2H), 7.32 (t, *J* = 7.4 Hz, 1H), 6.90 (d, *J* = 8.3 Hz, 2H), 5.12 (s, 1H), 4.82 (d, *J* = 9.4 Hz, 1H), 4.54 (d, *J* = 13.3 Hz, 1H), 4.11 (d, *J* = 9.5 Hz, 1H), 3.99 (q, *J* = 7.0 Hz, 2H), 3.61 (d, *J* = 13.3 Hz, 1H), 1.39 (t, *J* = 7.0 Hz, 3H). 13C NMR (150 MHz, CDCl3/CS2 (3:1 v/v)) δ 159.00, 156.08, 153.74, 153.26, 147.09, 147.08, 146.59, 146.22, 146.16, 146.11, 146.07, 146.00, 145.97, 145.93, 145.90, 145.73, 145.72, 145.57, 145.37, 145.33, 145.28, 145.22, 145.21, 145.09, 145.05, 145.03, 144.93, 144.51, 144.47, 144.19, 144.17, 142.96, 142.79, 142.48, 142.41, 142.37, 142.37, 142.14, 142.05, 141.96, 141.94, 141.91, 141.89, 141.83, 141.81, 141.76, 141.66, 141.45, 141.38, 140.00, 139.97, 139.78, 139.40, 136.68, 136.40, 135.67, 135.56, 130.29, 128.69, 128.60, 128.21, 127.46, 80.85(sp3-C of C60), 76.58(sp3-C of C60), 68.29, 66.35, 63.20, 56.57, 14.94. UV−vis (toluene) λ/(nm): 286, 336, 433. HRMS (MALDI-TOF) *m/z* calcd for C77H19NO [M + H]+ 973.1461, found 973.1455.

**1H NMR spectra and 13C NMR spectra of compounds 2a-b.**


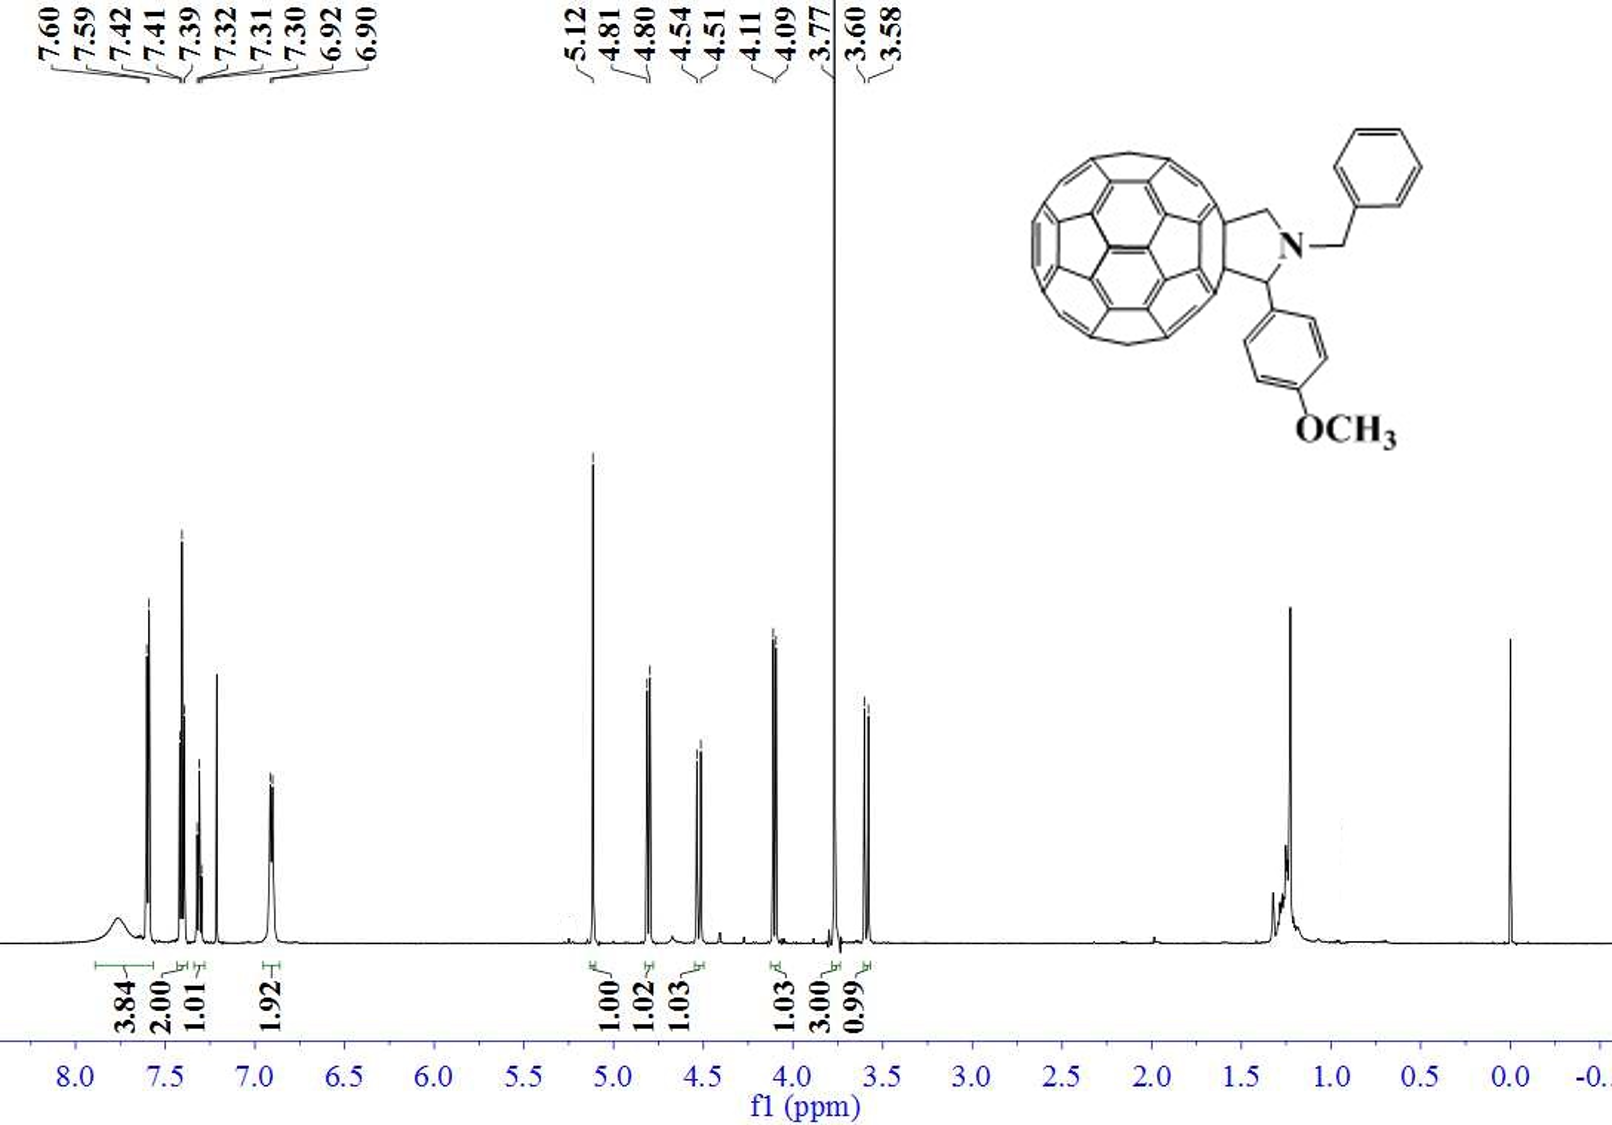


**Figure S1.** 1H NMR (600 MHz, CS2/CDCl3) of compound **2a**


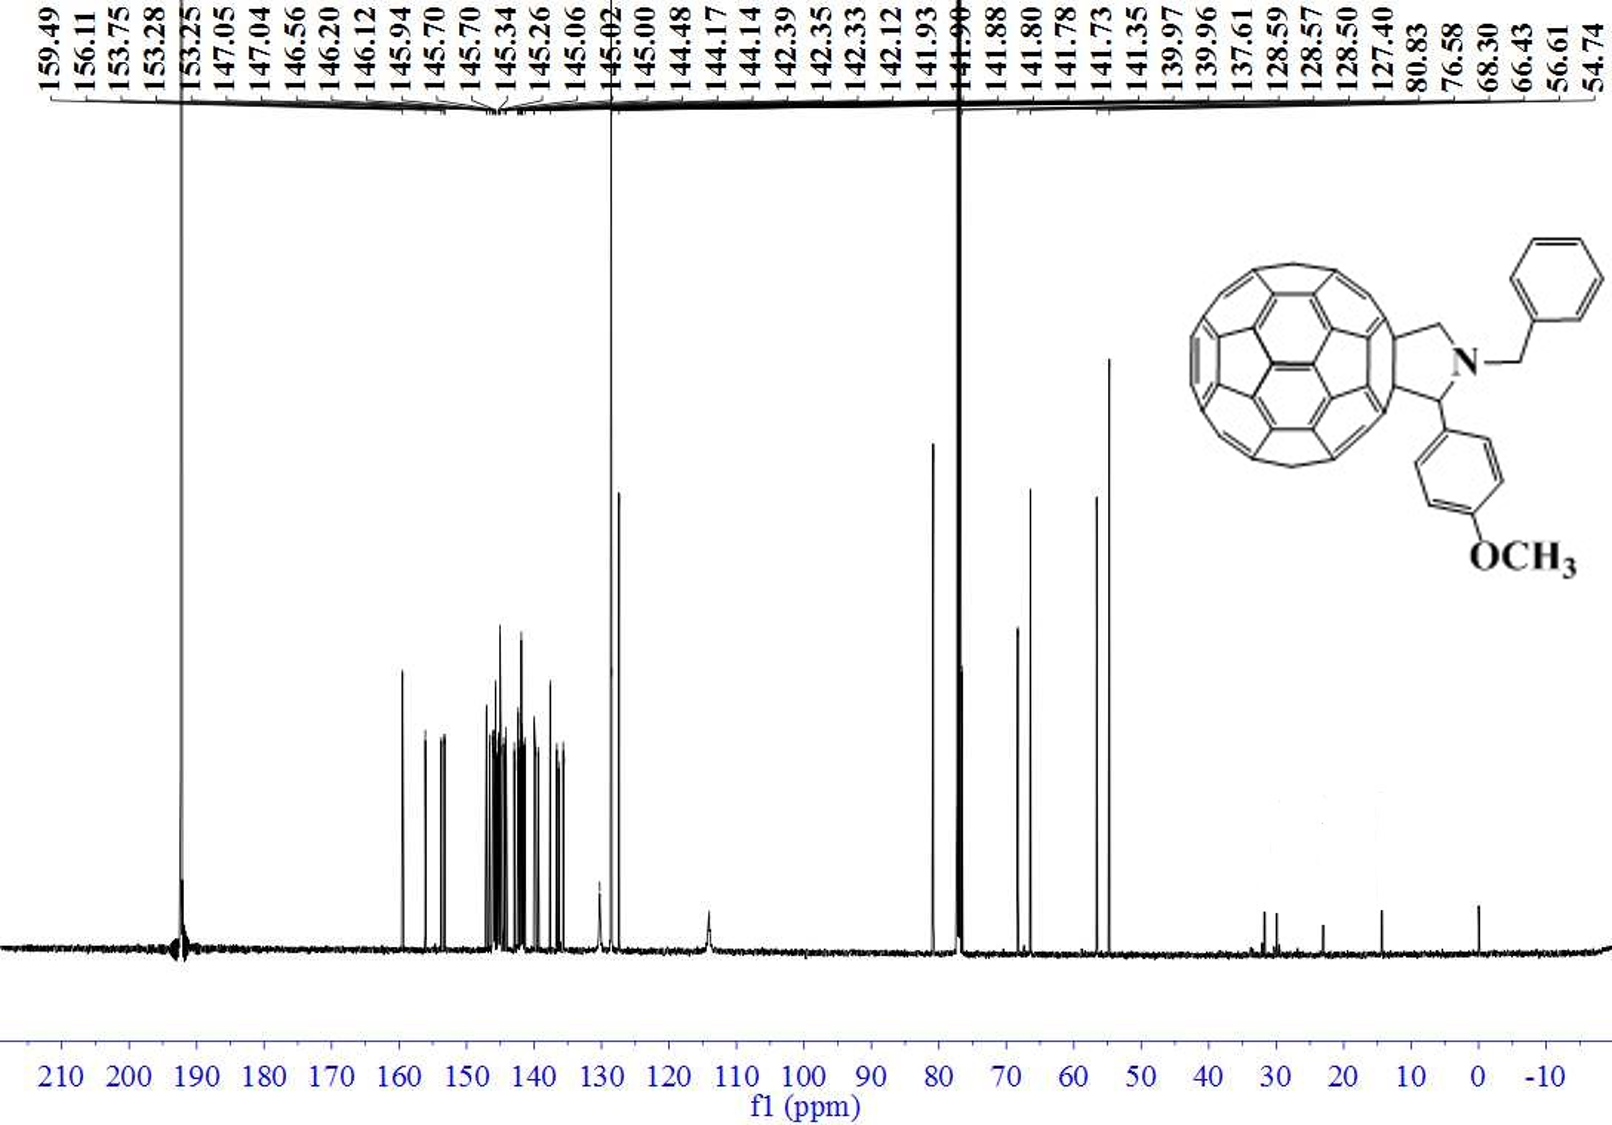


**Figure S2.** 13C NMR (150 MHz, CS2/CDCl3) of compound **2a**


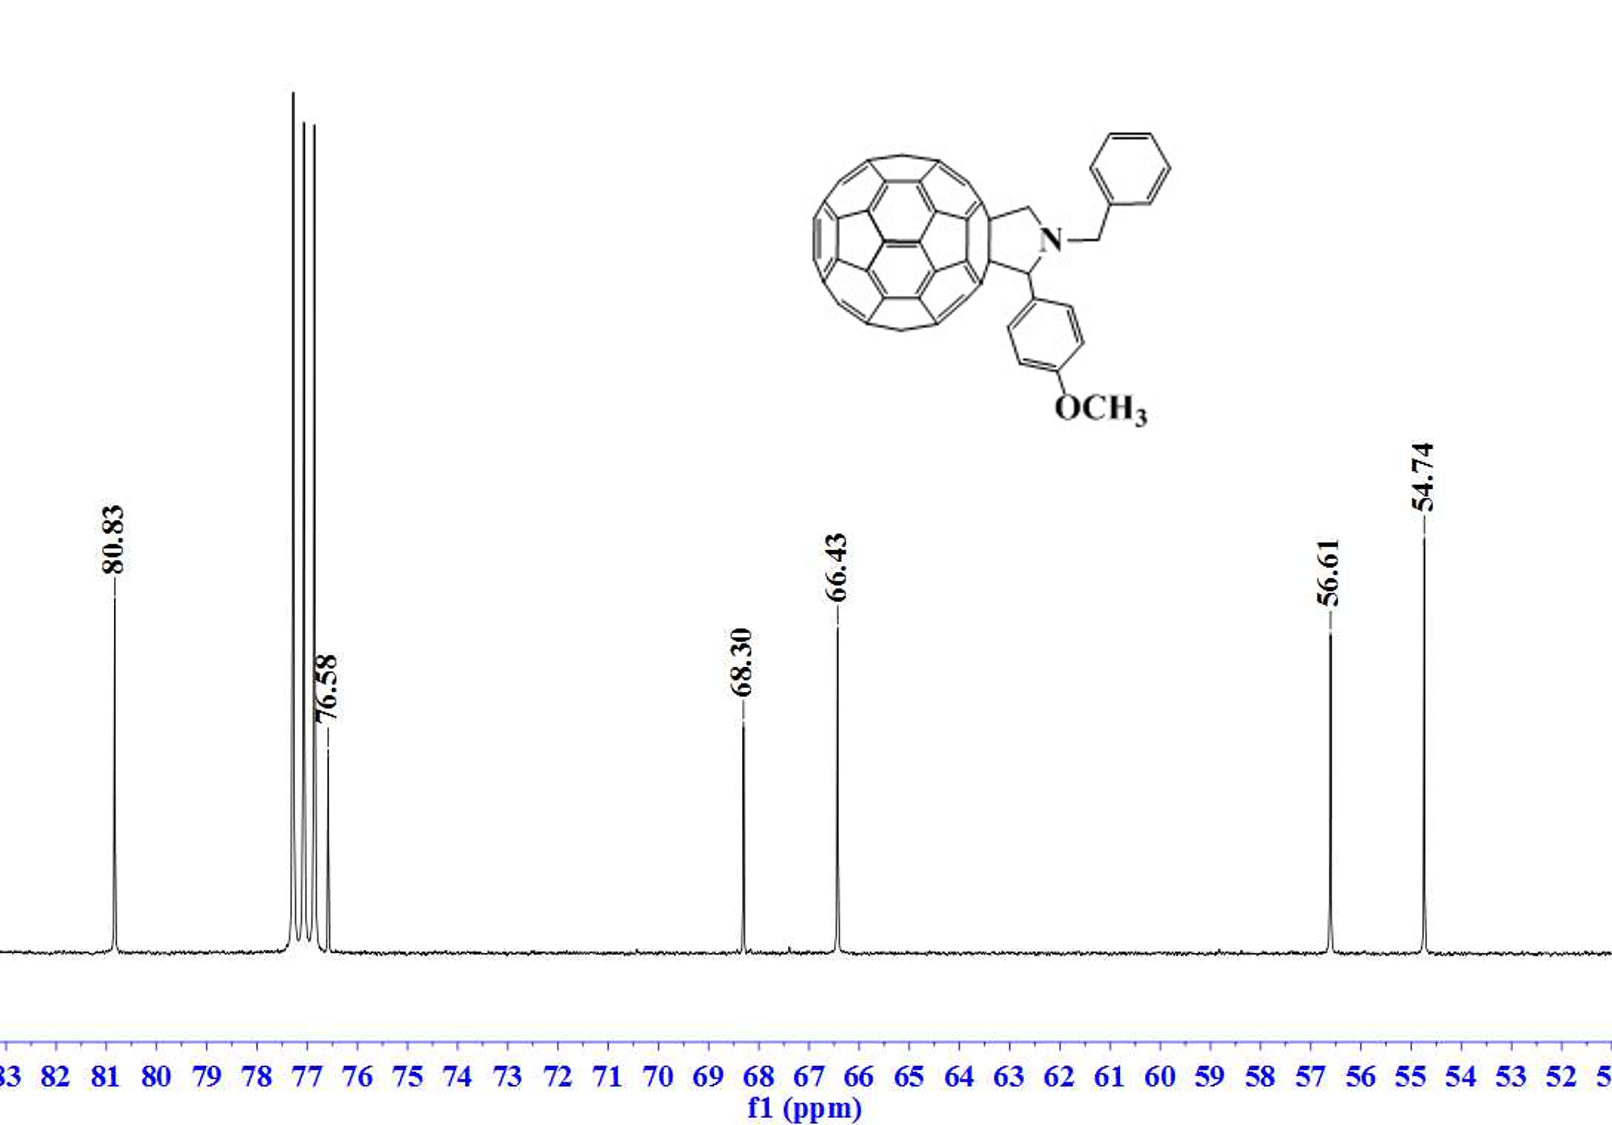


**Figure S2-1.** Expanded 13C NMR (150 MHz, CS2/CDCl3) of compound **2a**


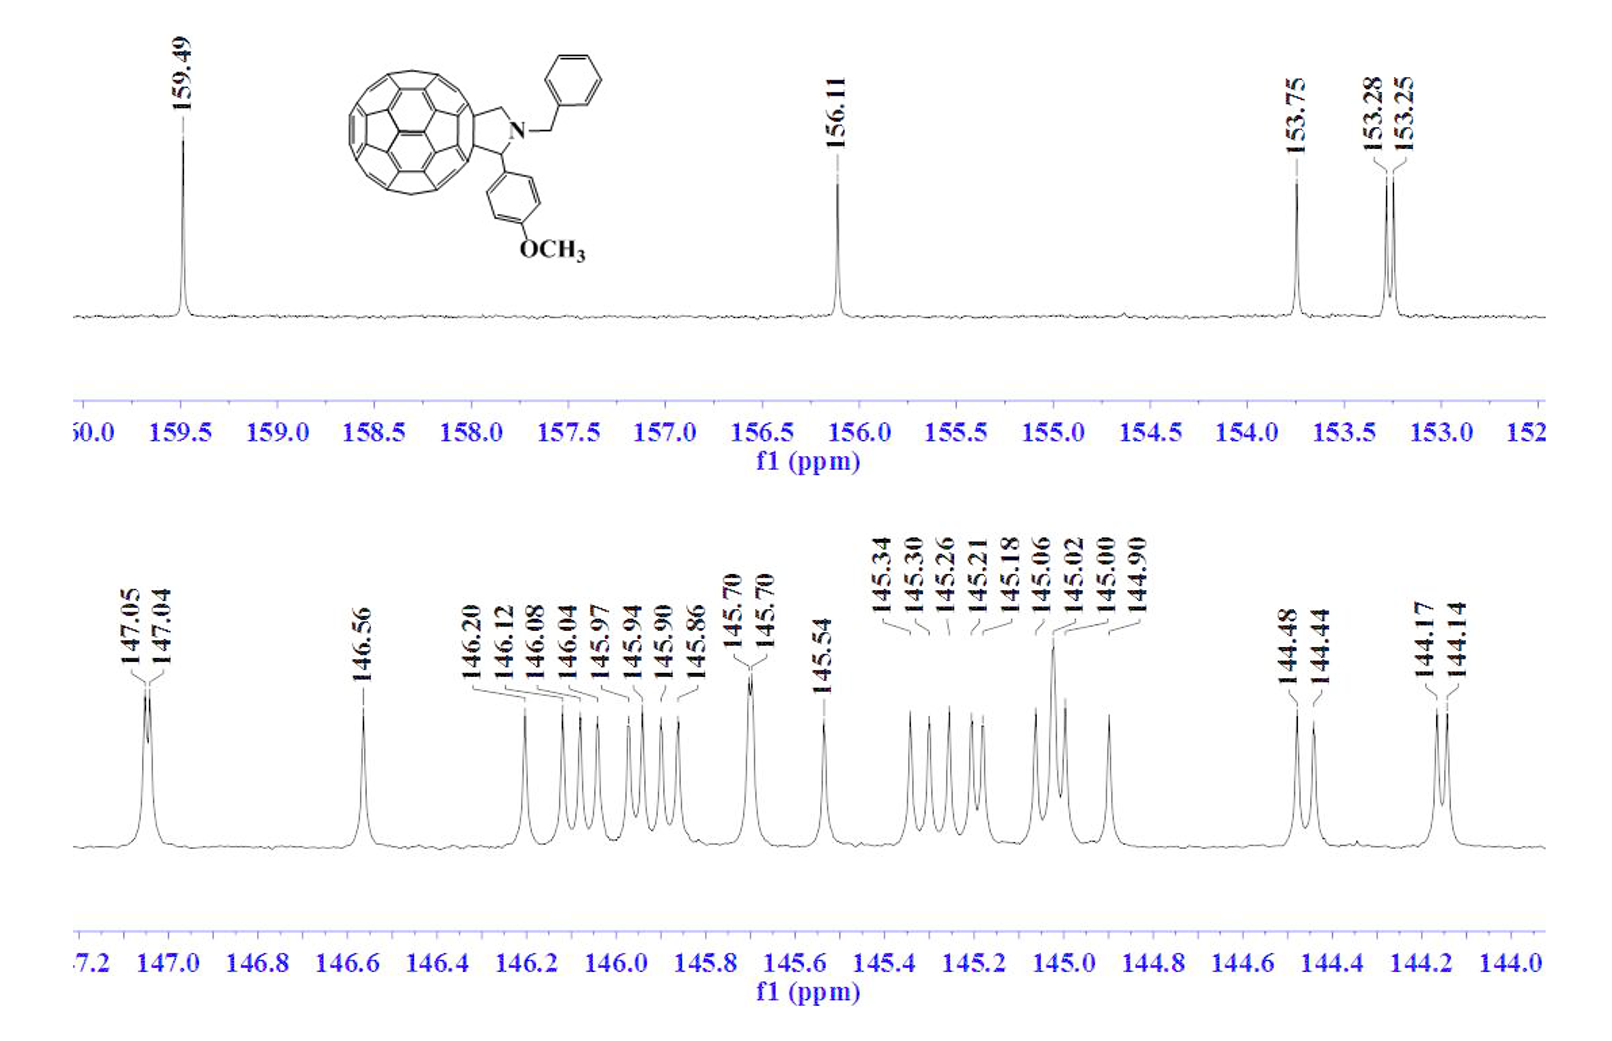


**Figure S2-2.** Expanded 13C NMR (150 MHz, CS2/CDCl3) of compound **2a**


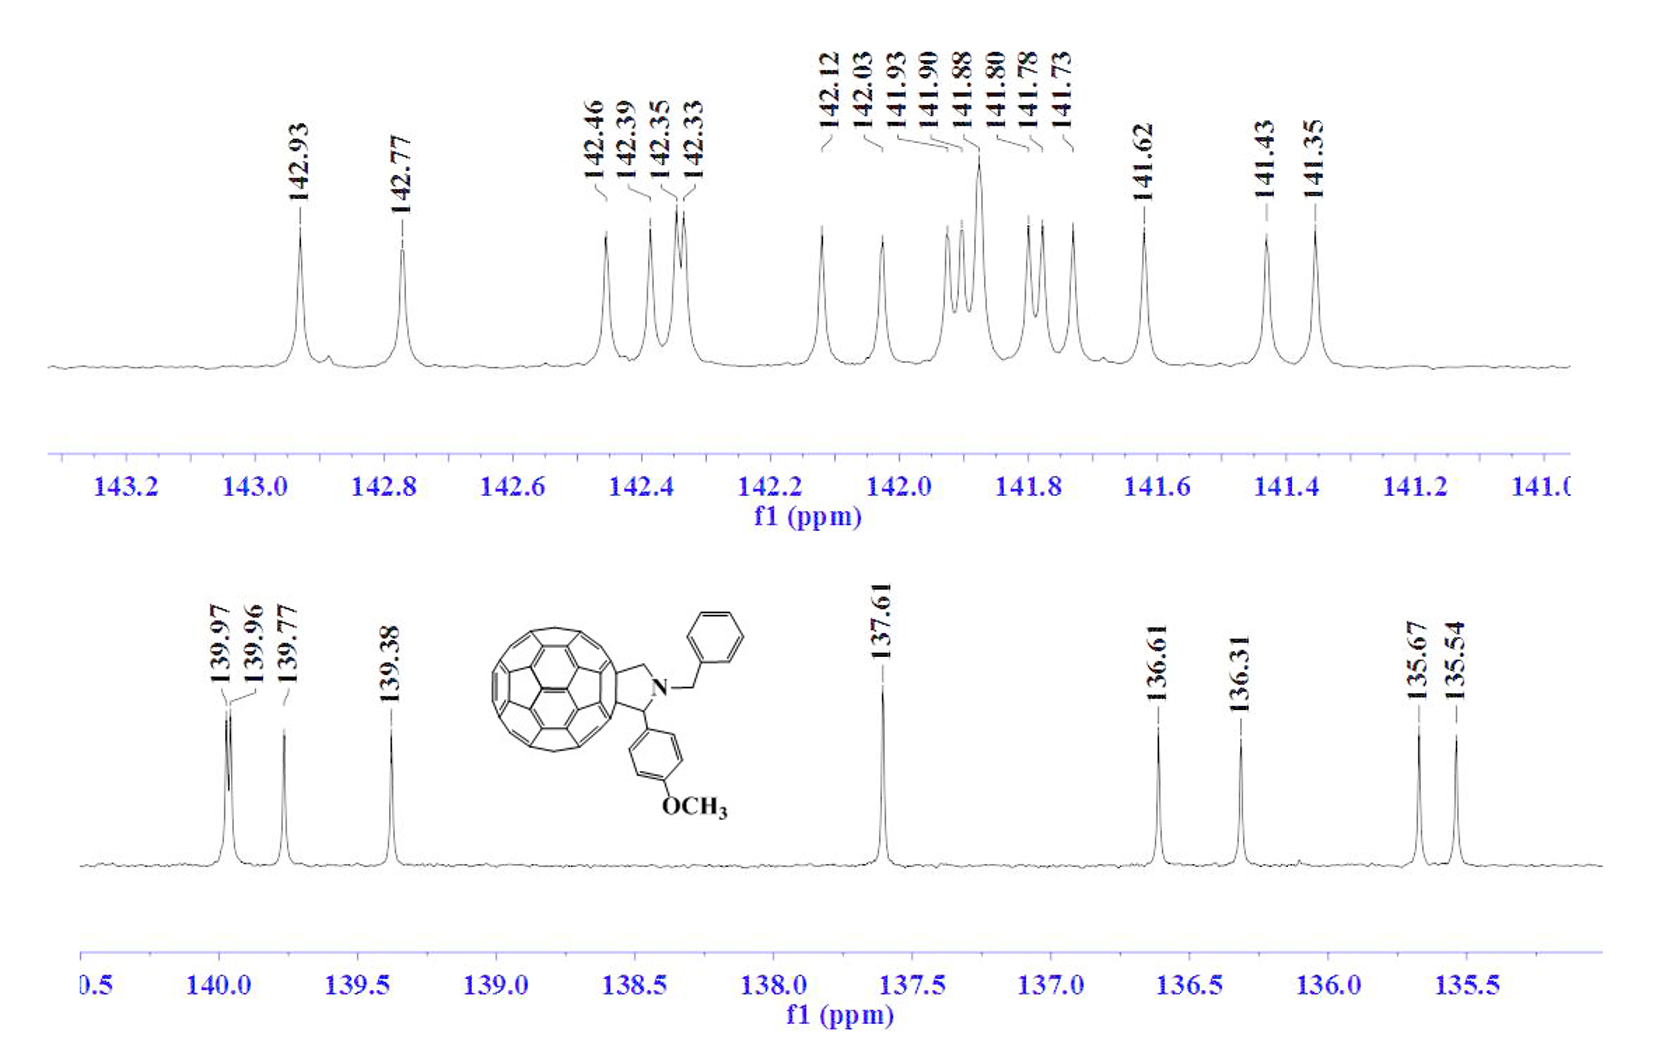


**Figure S2-3.** Expanded 13C NMR (150 MHz, CS2/CDCl3) of compound **2a**


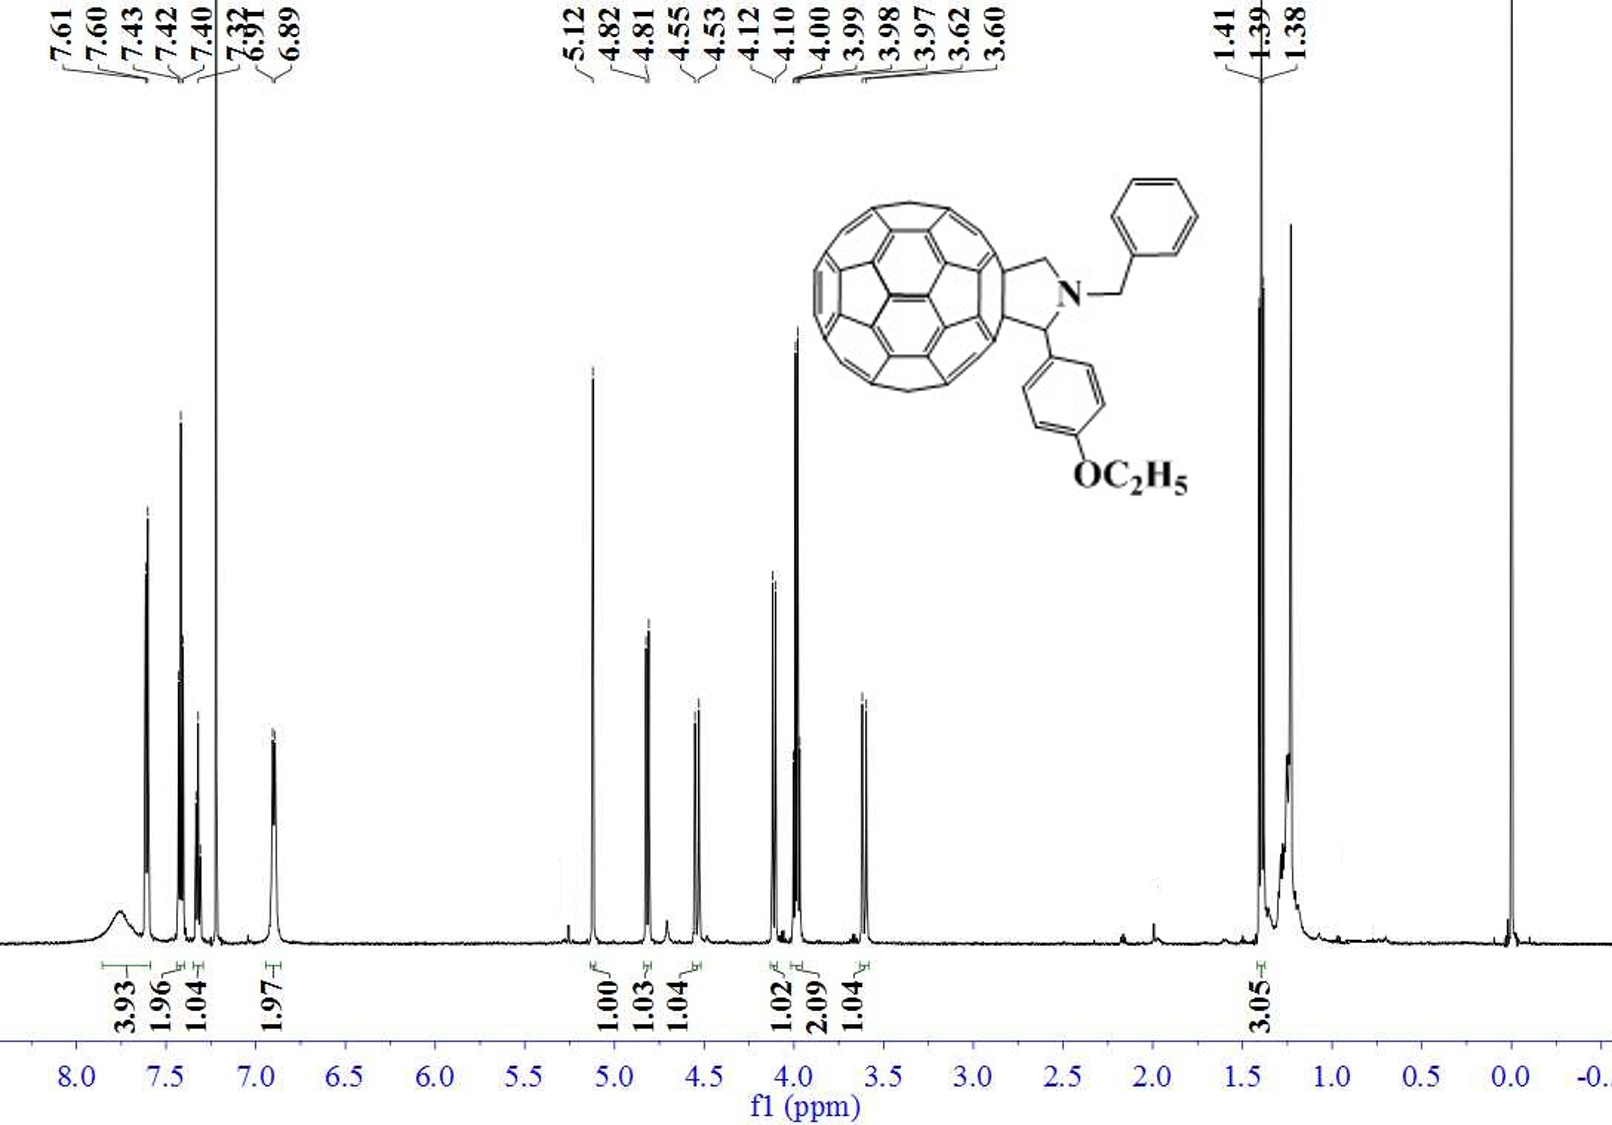


**Figure S3.** 1H NMR (600 MHz, CS2/CDCl3) of compound **2b**


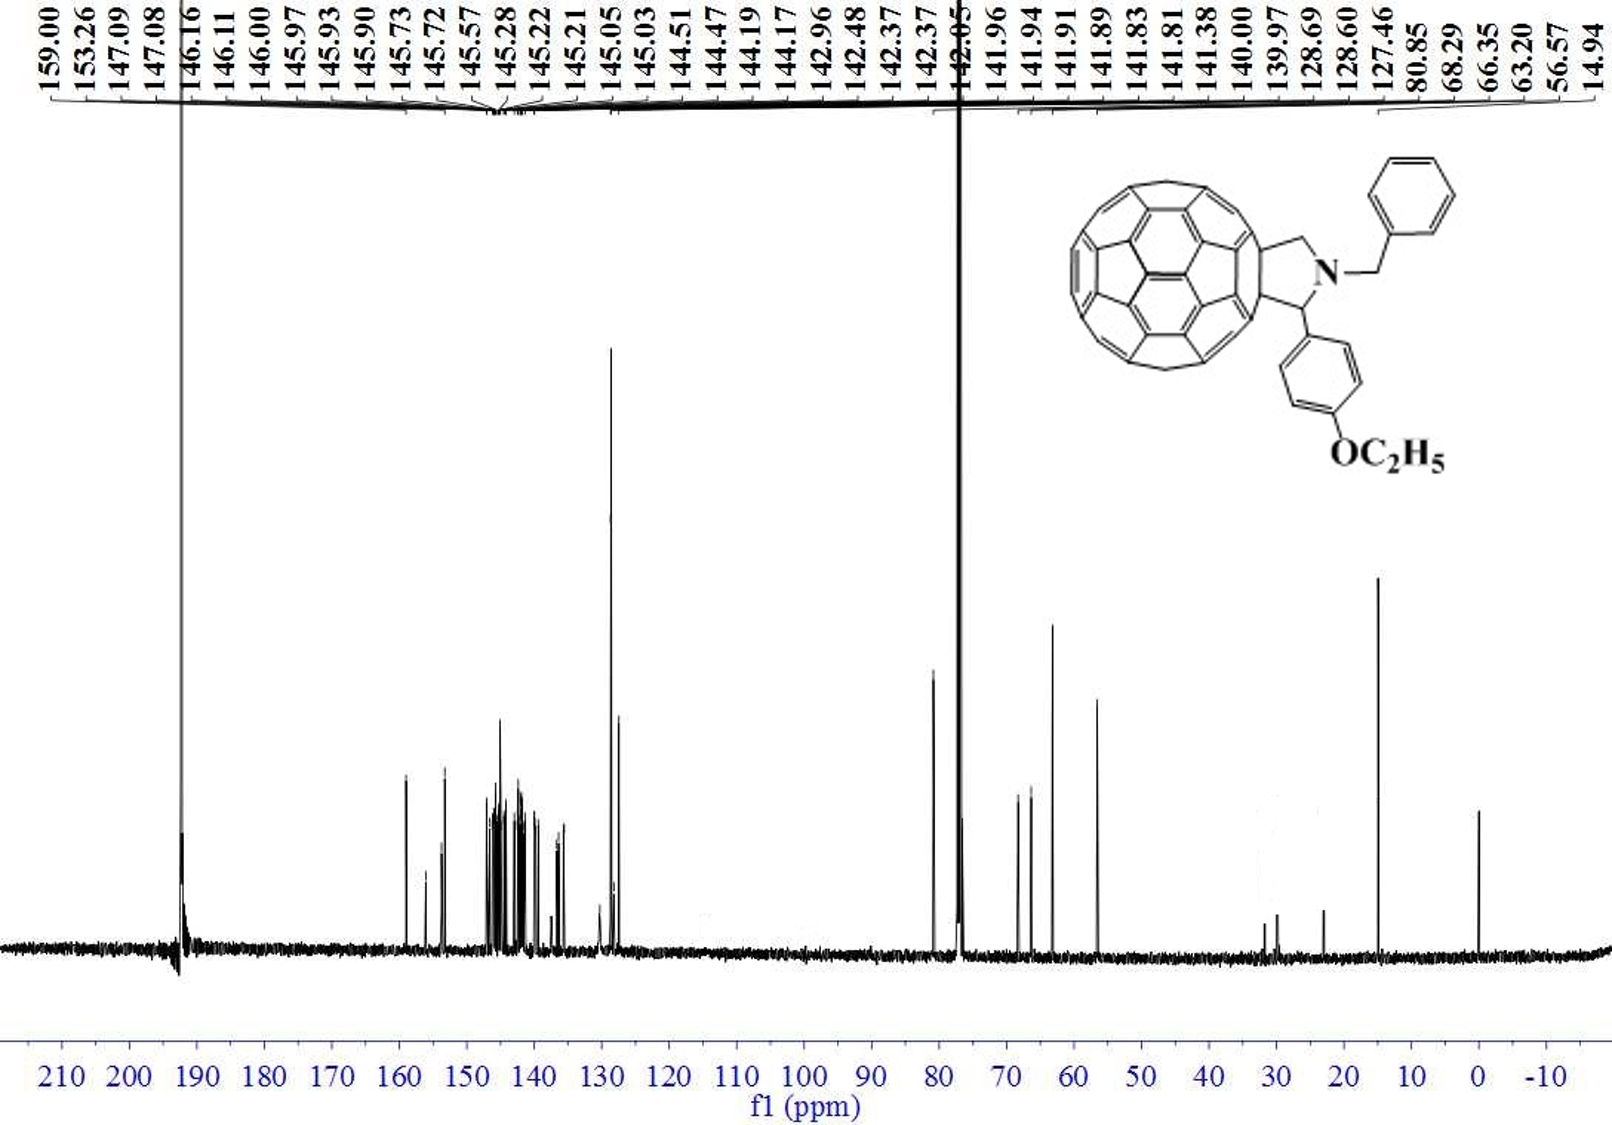


**Figure S4.** 13C NMR (150 MHz, CS2/CDCl3) of compound **2b**


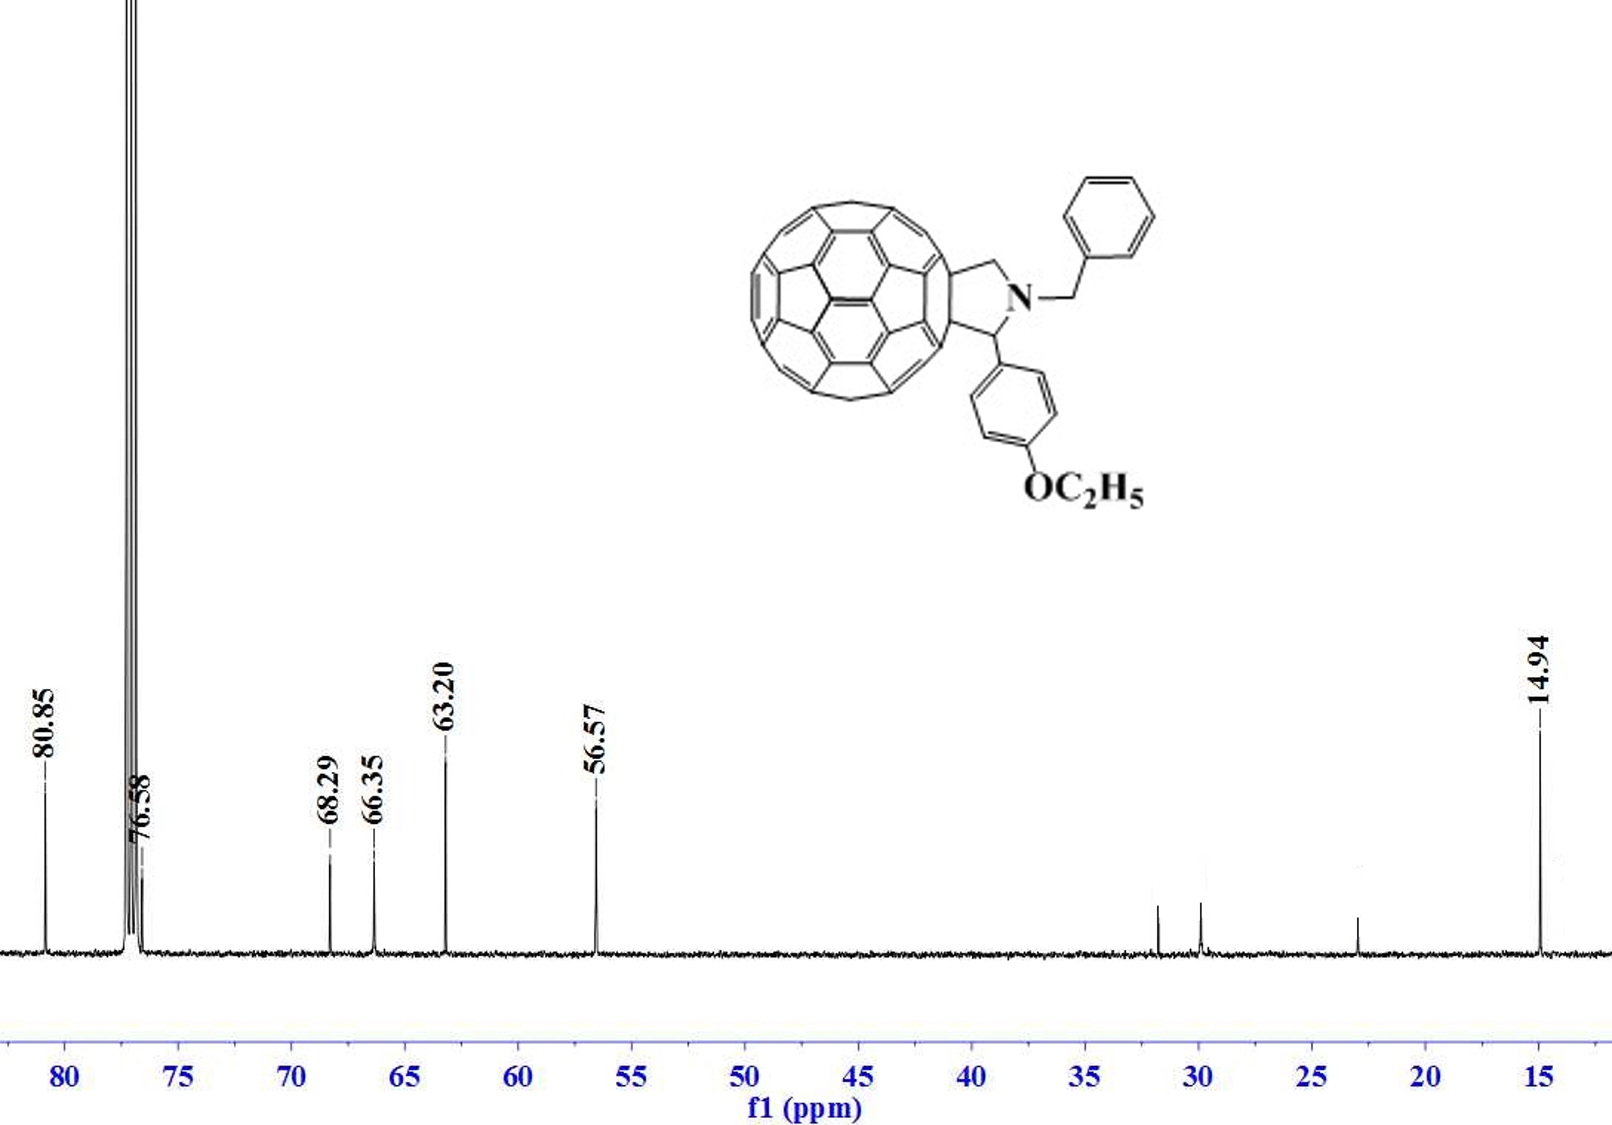


**Figure S4-1.** Expanded 13C NMR (150 MHz, CS2/CDCl3) of compound **2b**


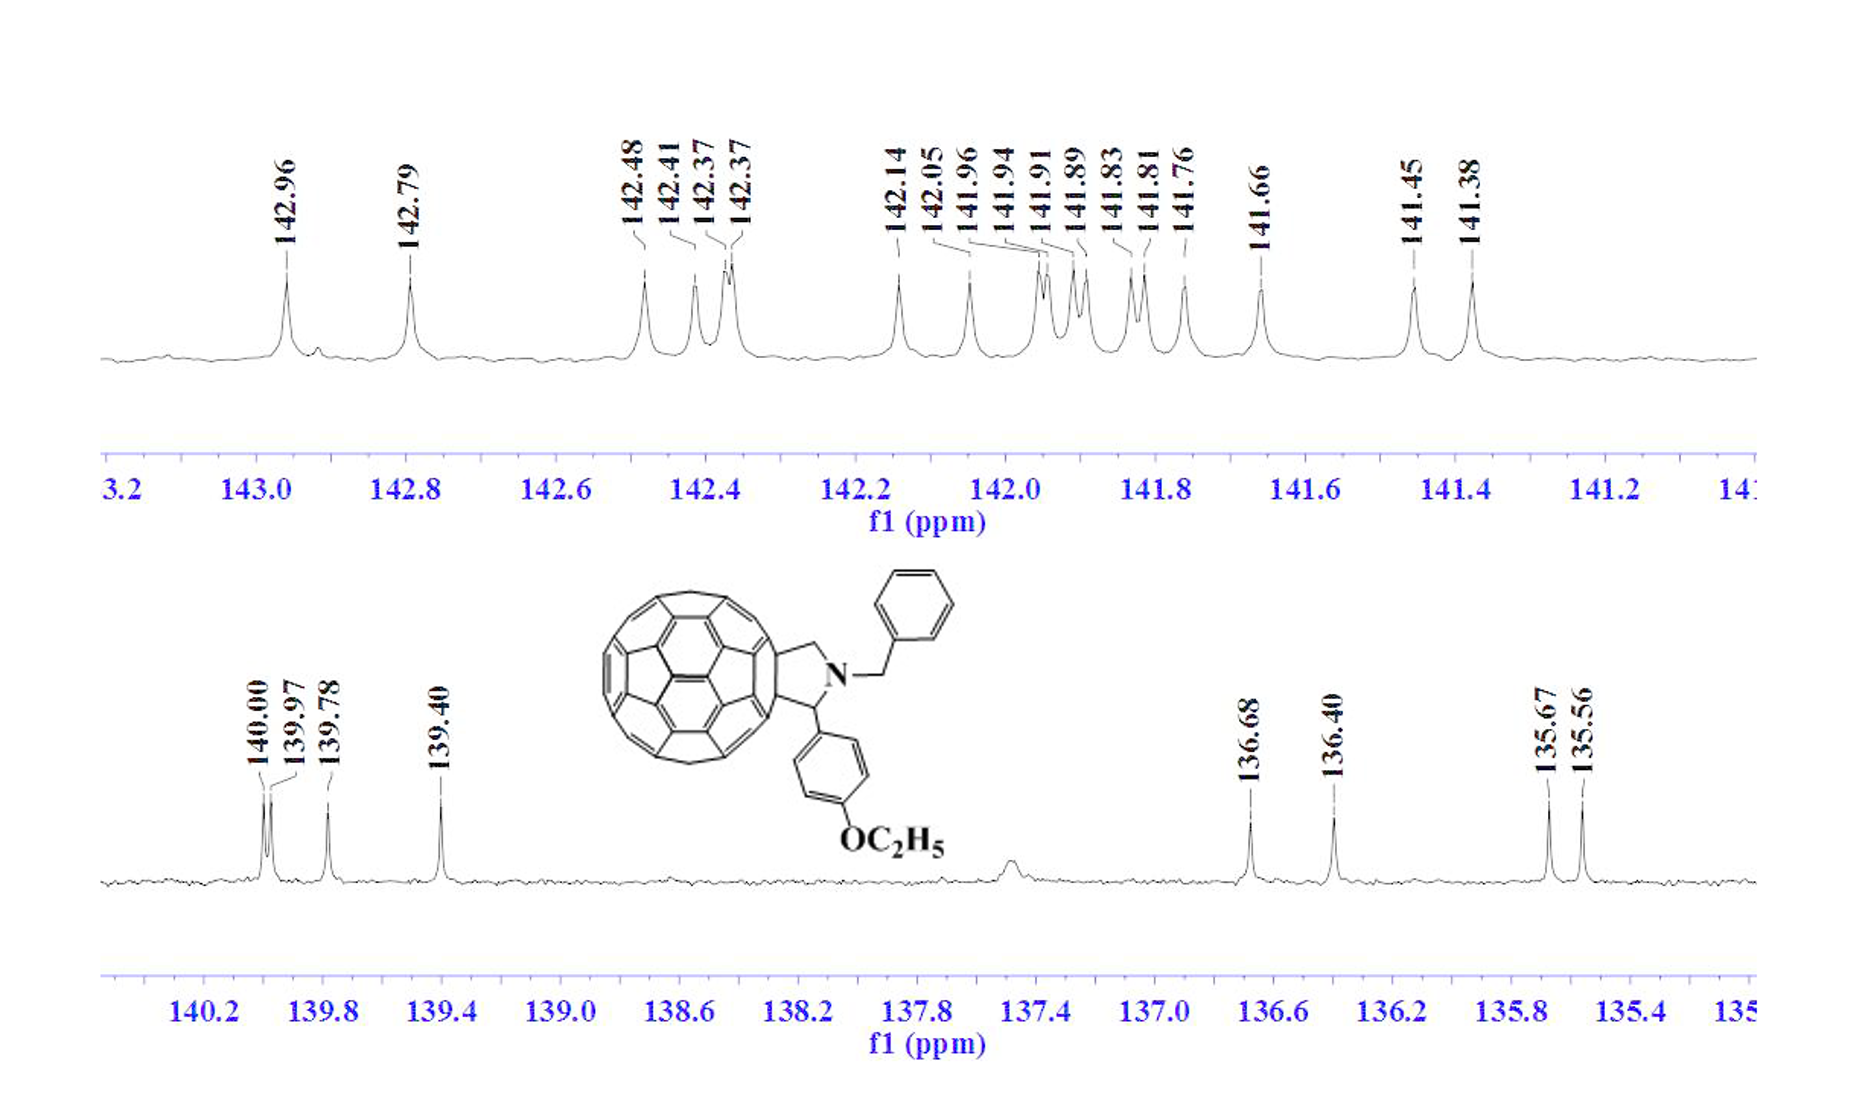


**Figure S4-2.** Expanded 13C NMR (150 MHz, CS2/CDCl3) of compound **2b**


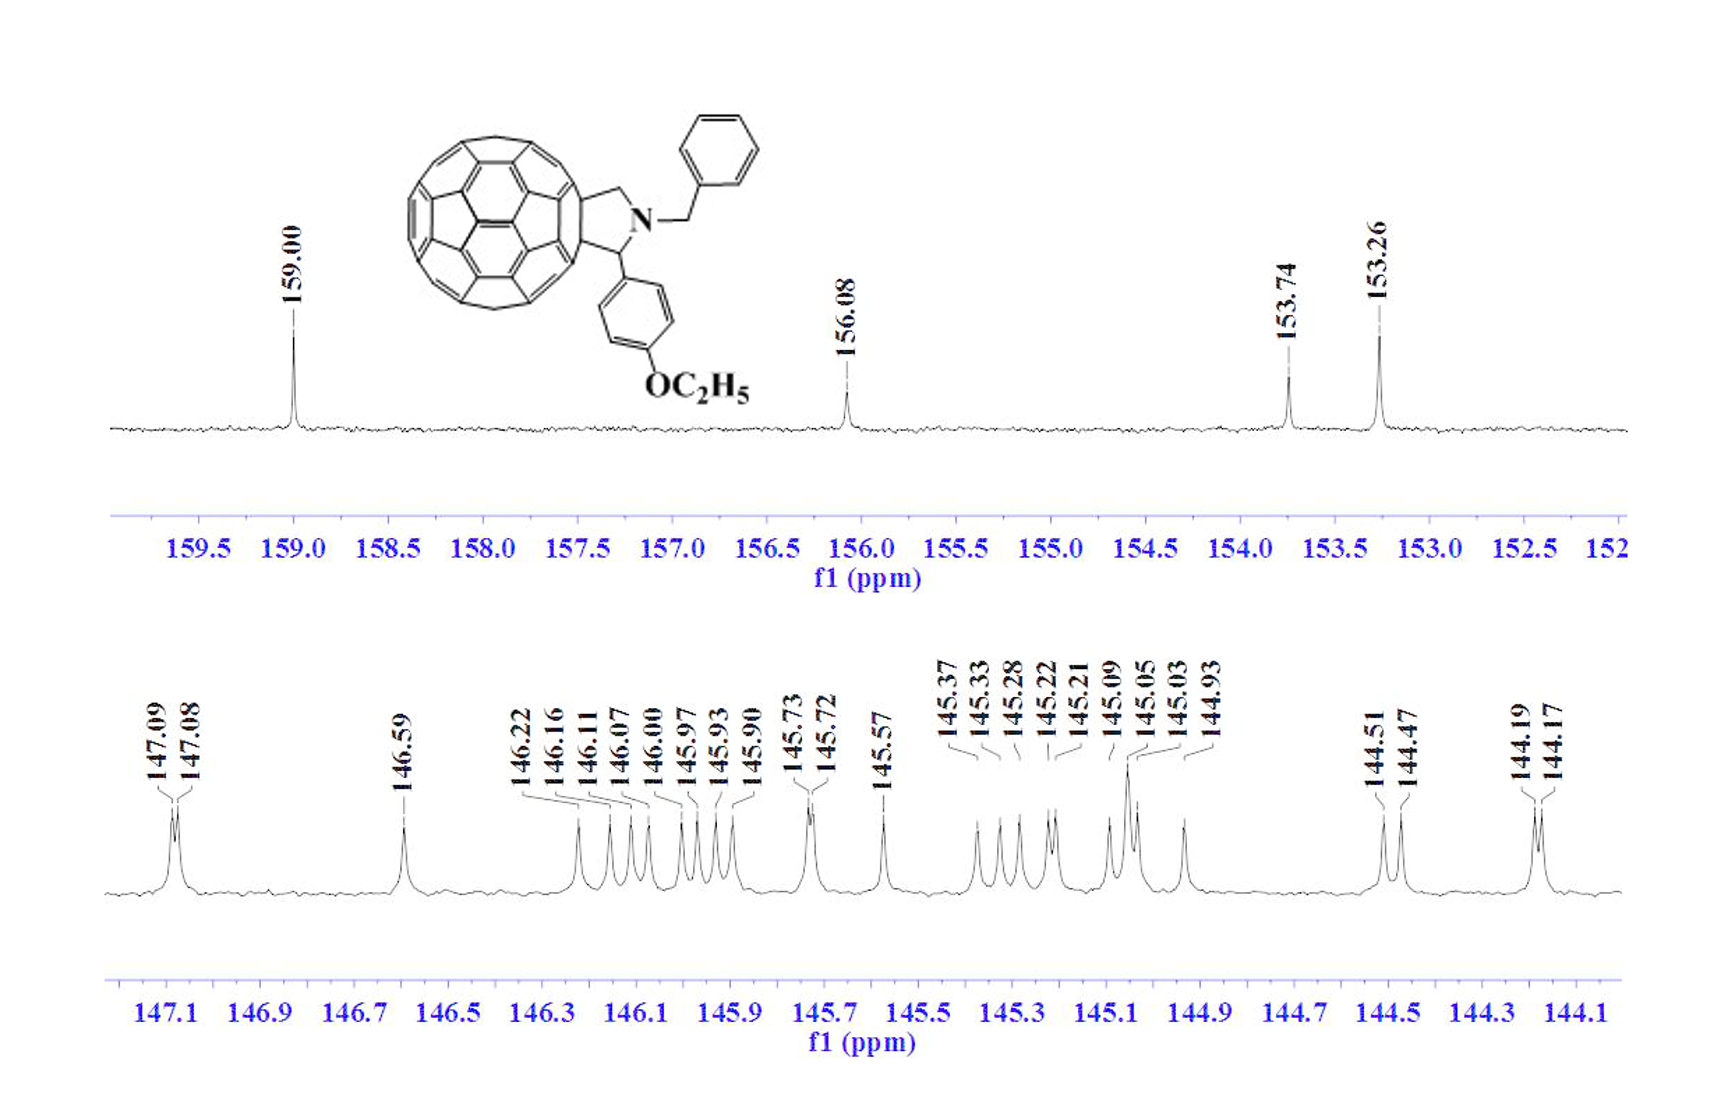


**Figure S4-3.** Expanded 13C NMR (150 MHz, CS2/CDCl3) of compound **2b**

**HRMS of compounds 2a-b**

The structures of products **2a-b** were also fully characterized by MALDI-TOF mass. **2a**: HRMS (MALDI-TOF) *m/z* calcd for C76H17NO [M + H]+ 959.1305, found 959.1309. **2b**: HRMS (MALDI-TOF) *m/z* calcd for C77H19NO [M + H]+ 973.1461, found 973.1455.


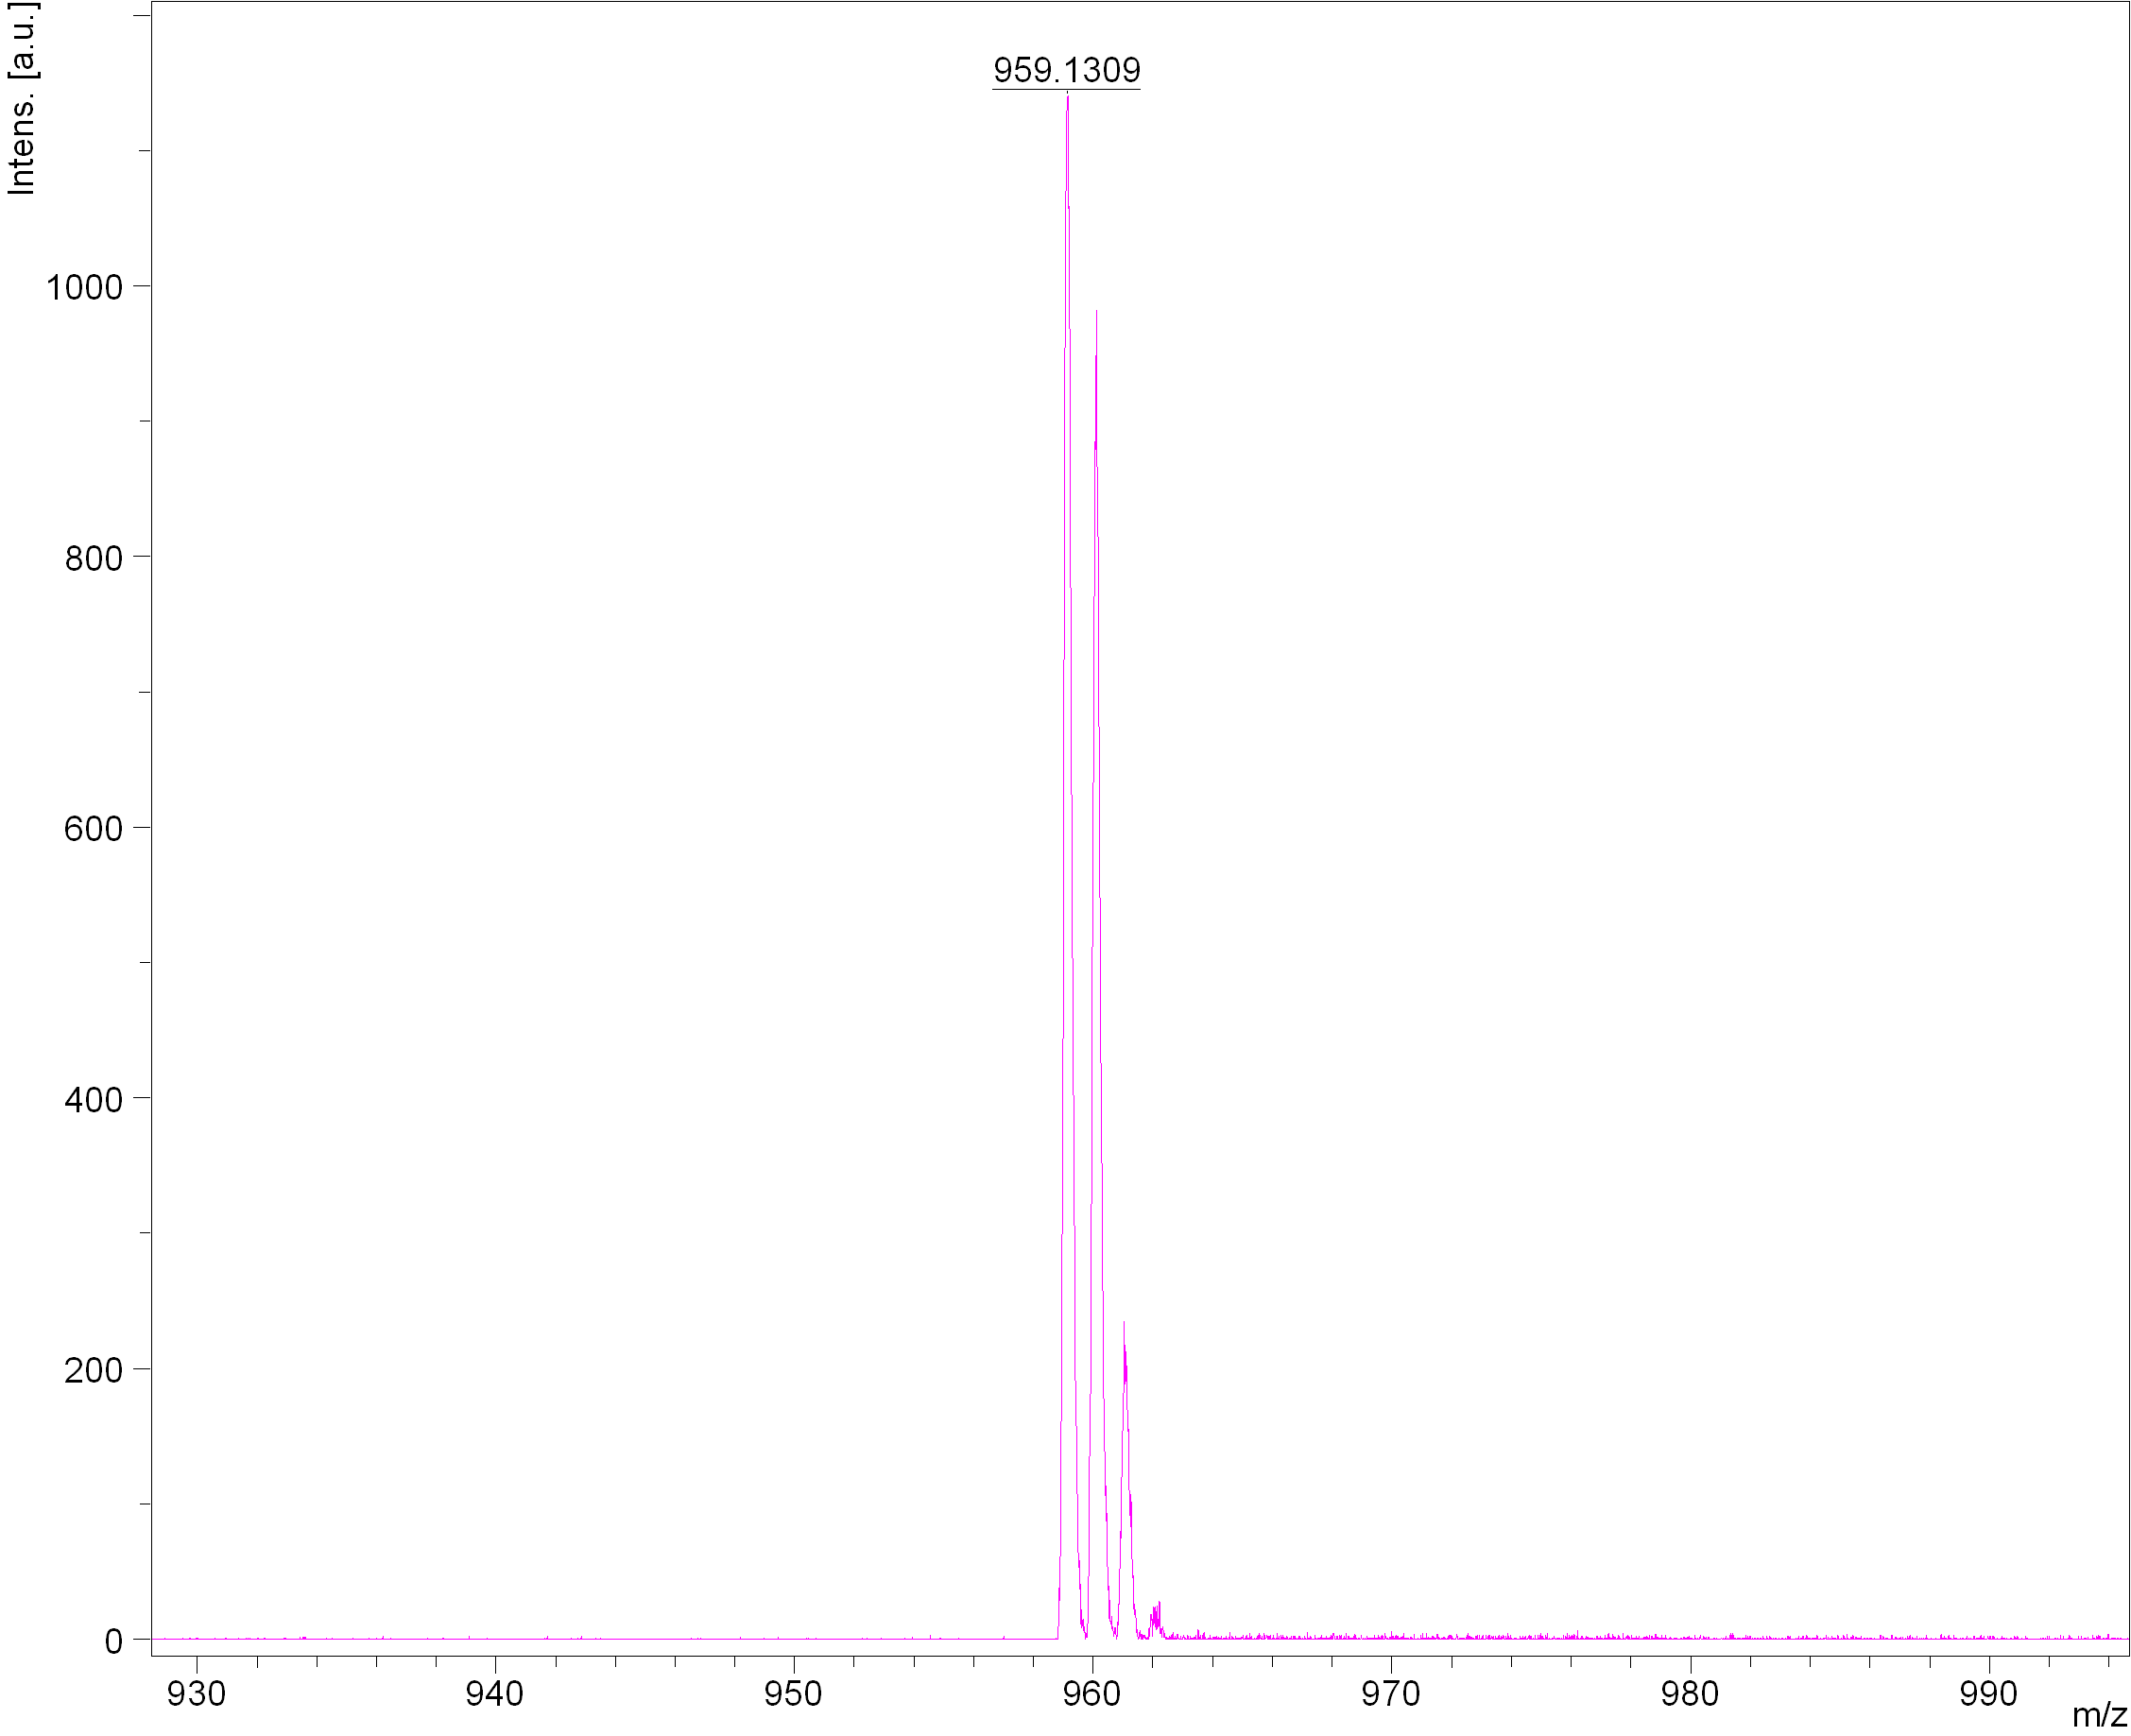


**Figure S5.** High Performance Liquid Chromatography of **2a**.


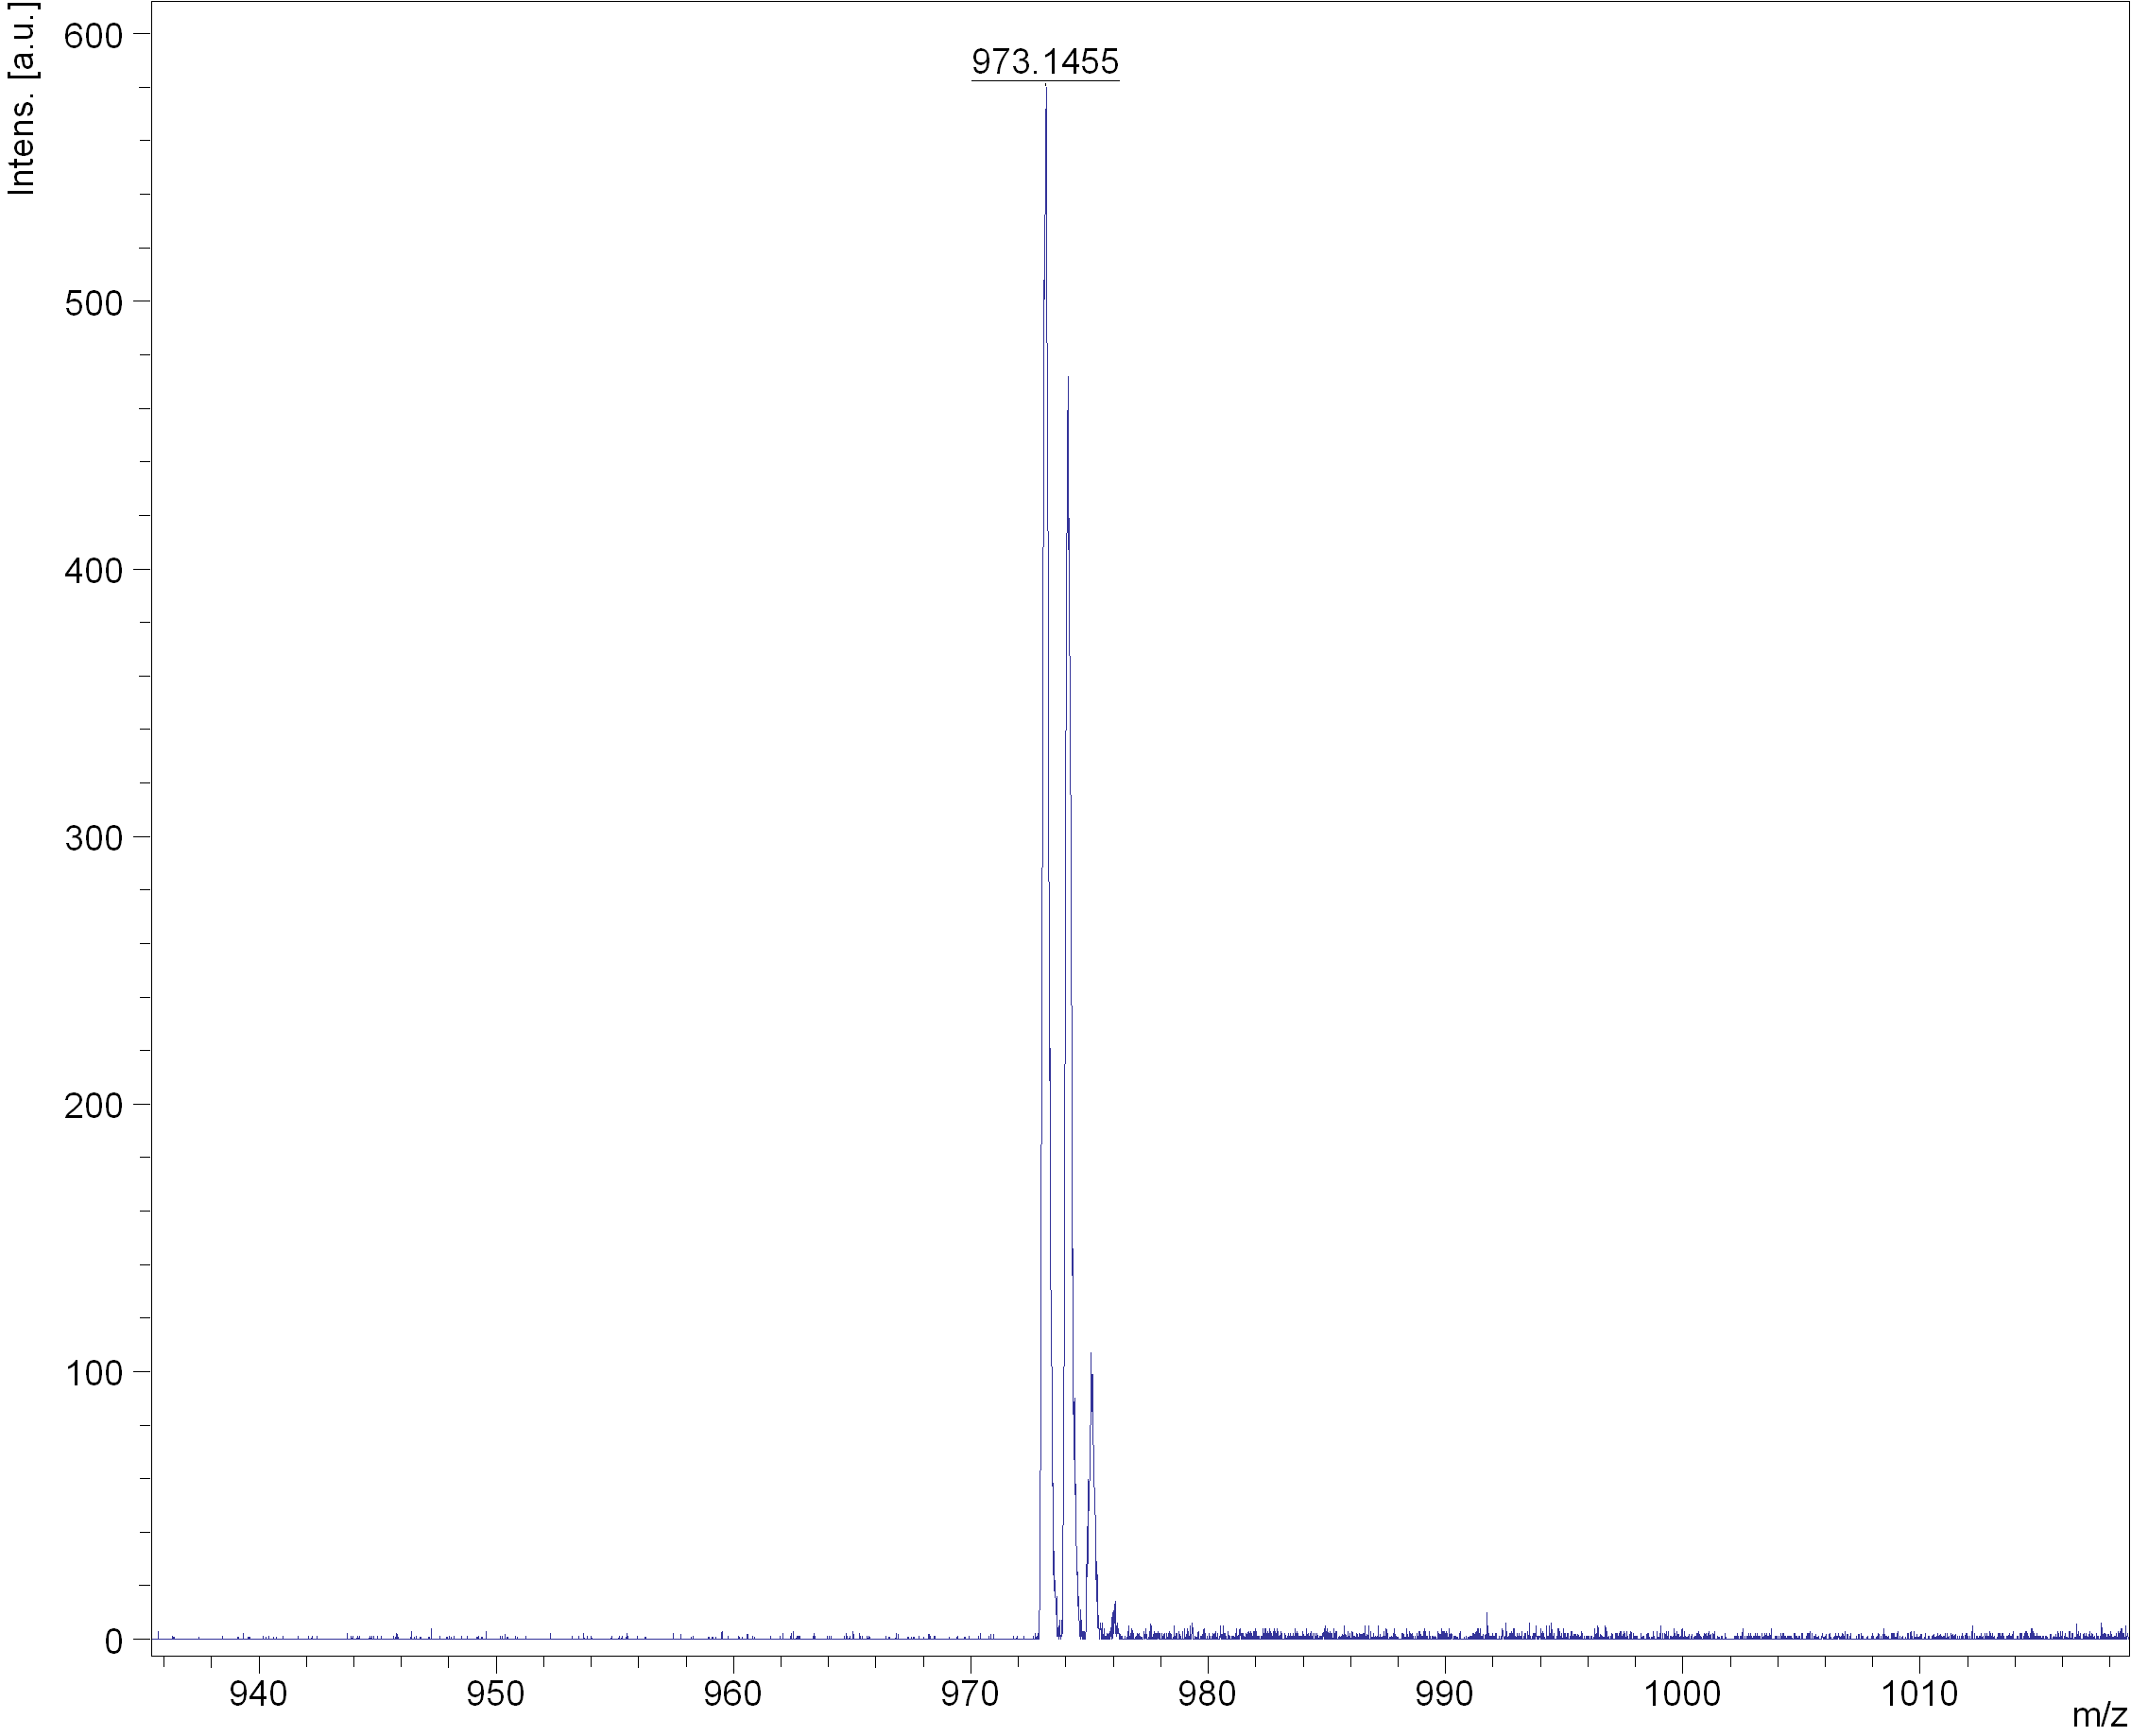


**Figure S6.** High Performance Liquid Chromatography of **2b**.

**HPLC of compounds 2a-b**

Compounds **2a** and **2b** were purified by LC-9104 (Japan Analytical Industry Co. Ltd.) on a Buckyprep Waters 10×250 mmcolumn. The mobile phase was toluene with a flow rate of 2 mL/min. The detection wavelength was at 330 nm. The retention time for **2a** is about 13 min and **2b** is about 12.5 min.


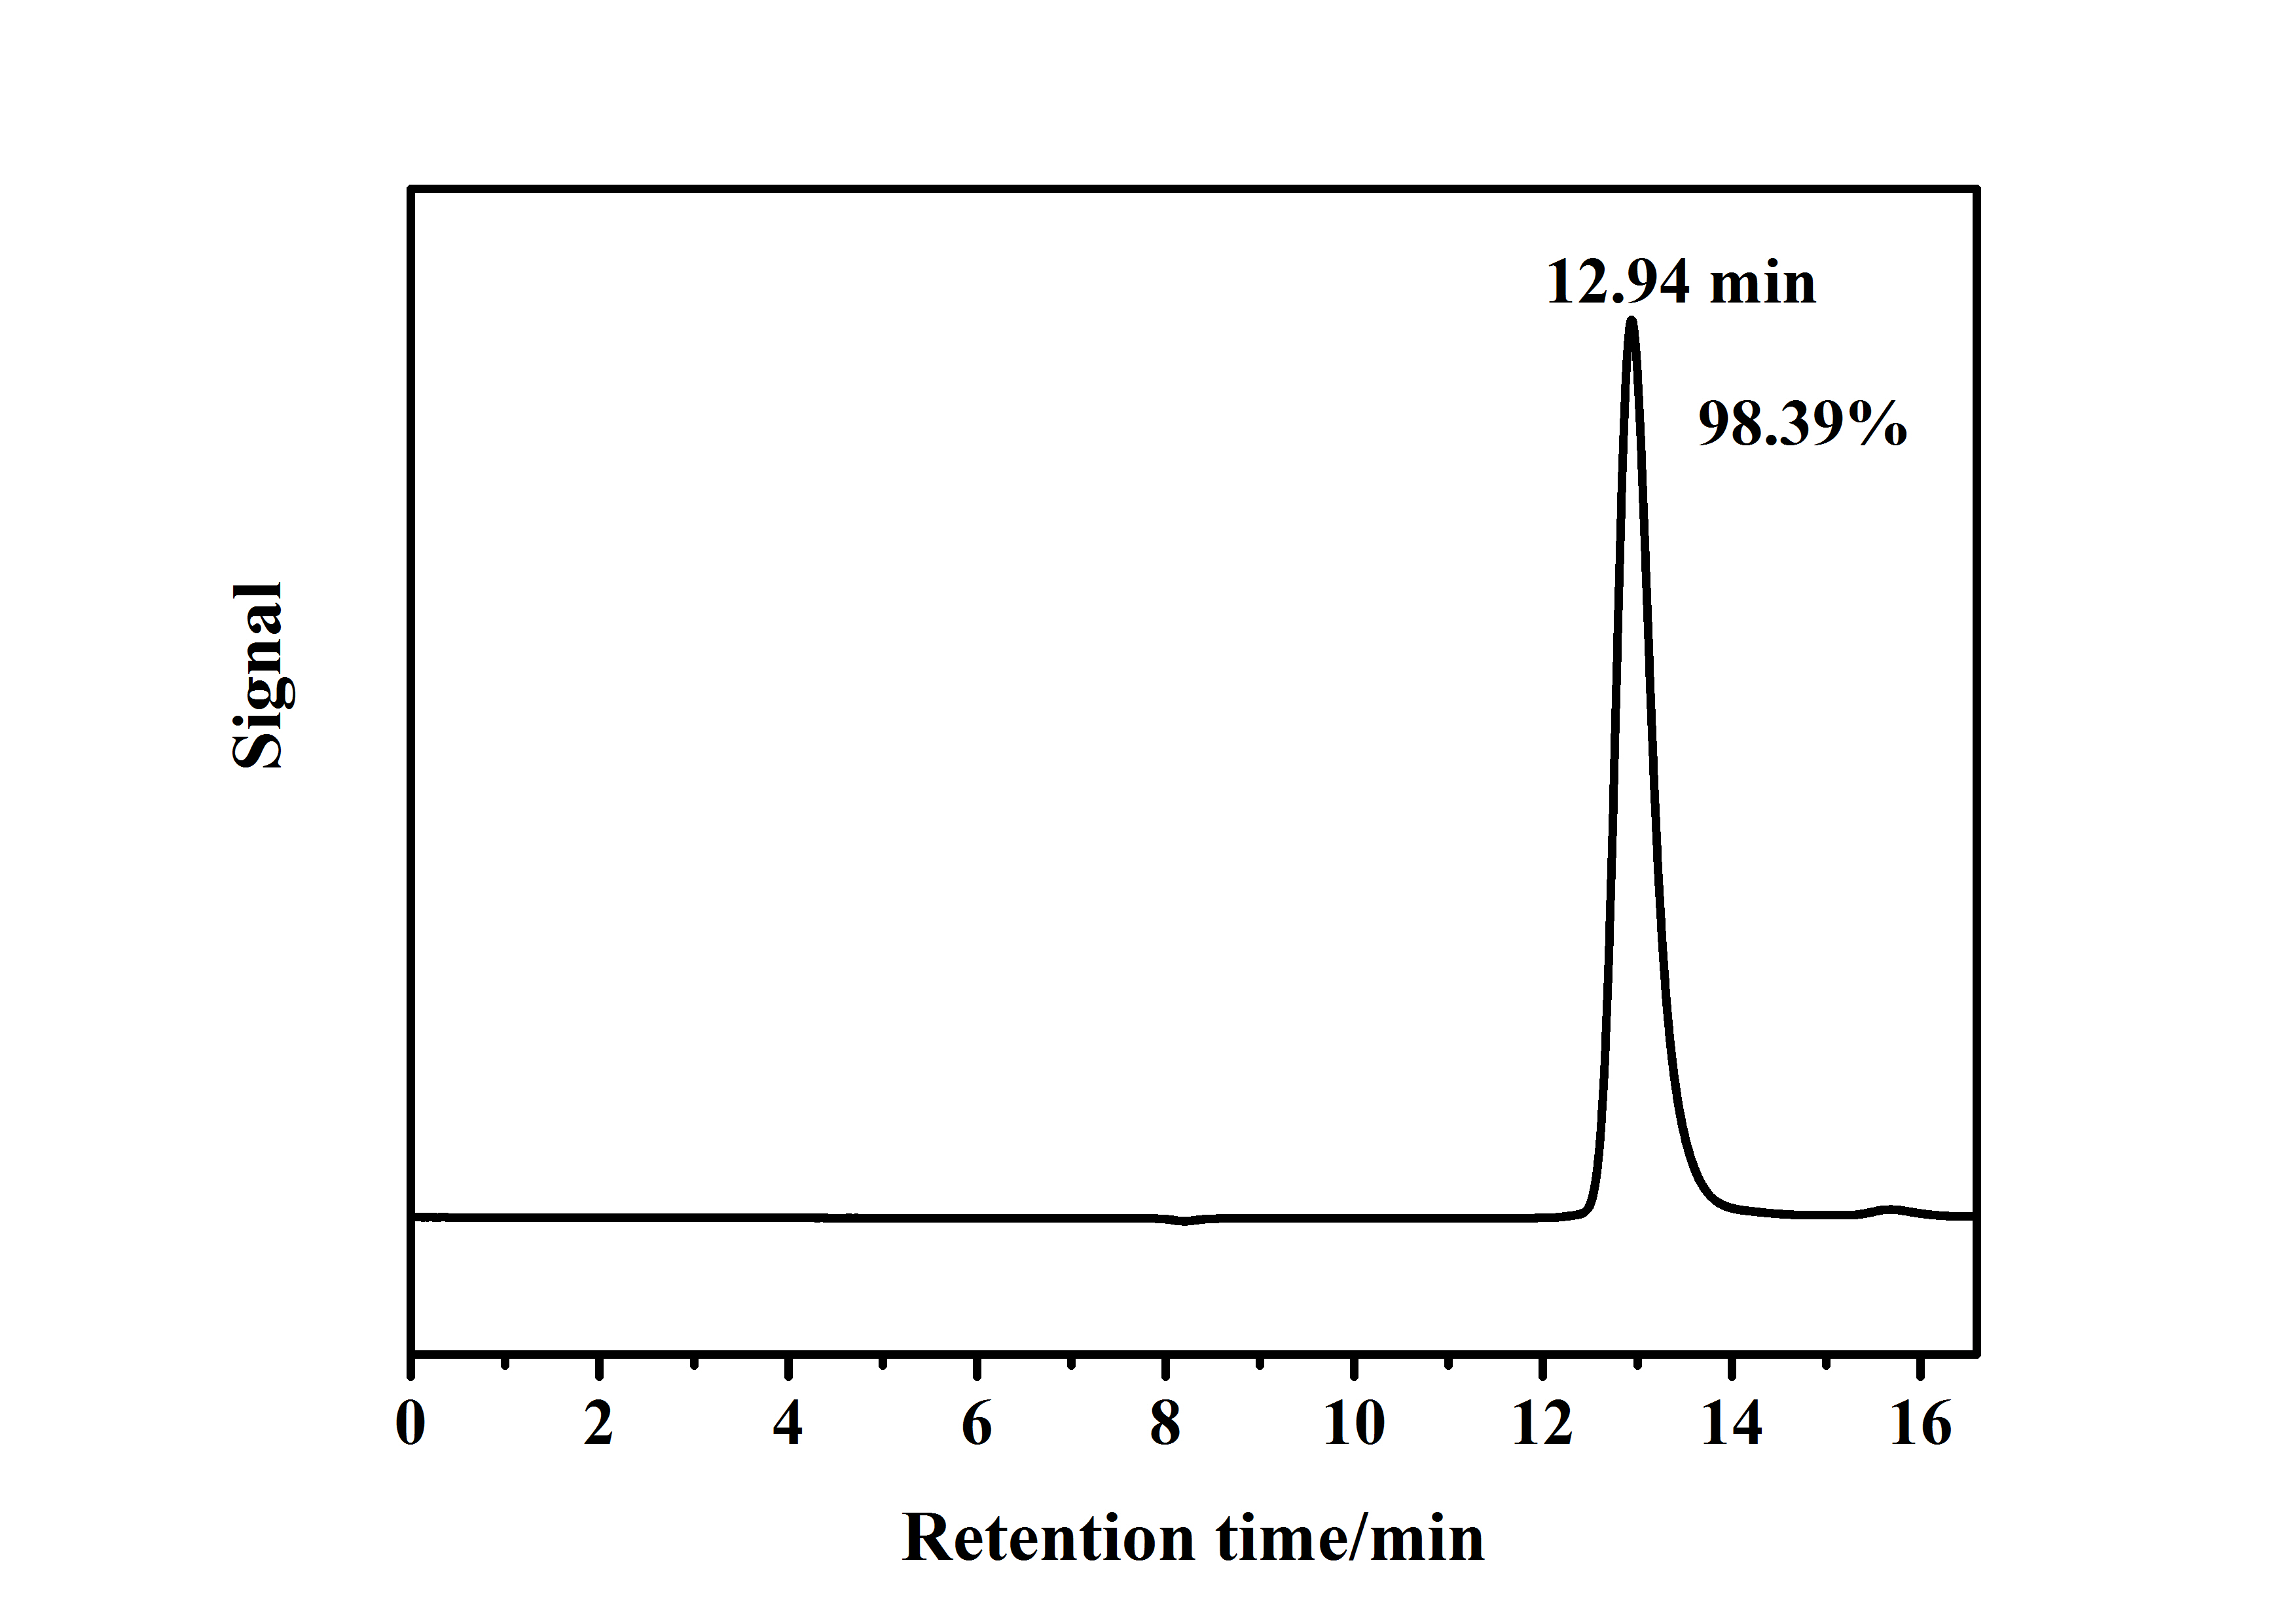


**Figure S7.** High Performance Liquid Chromatography of **2a**.


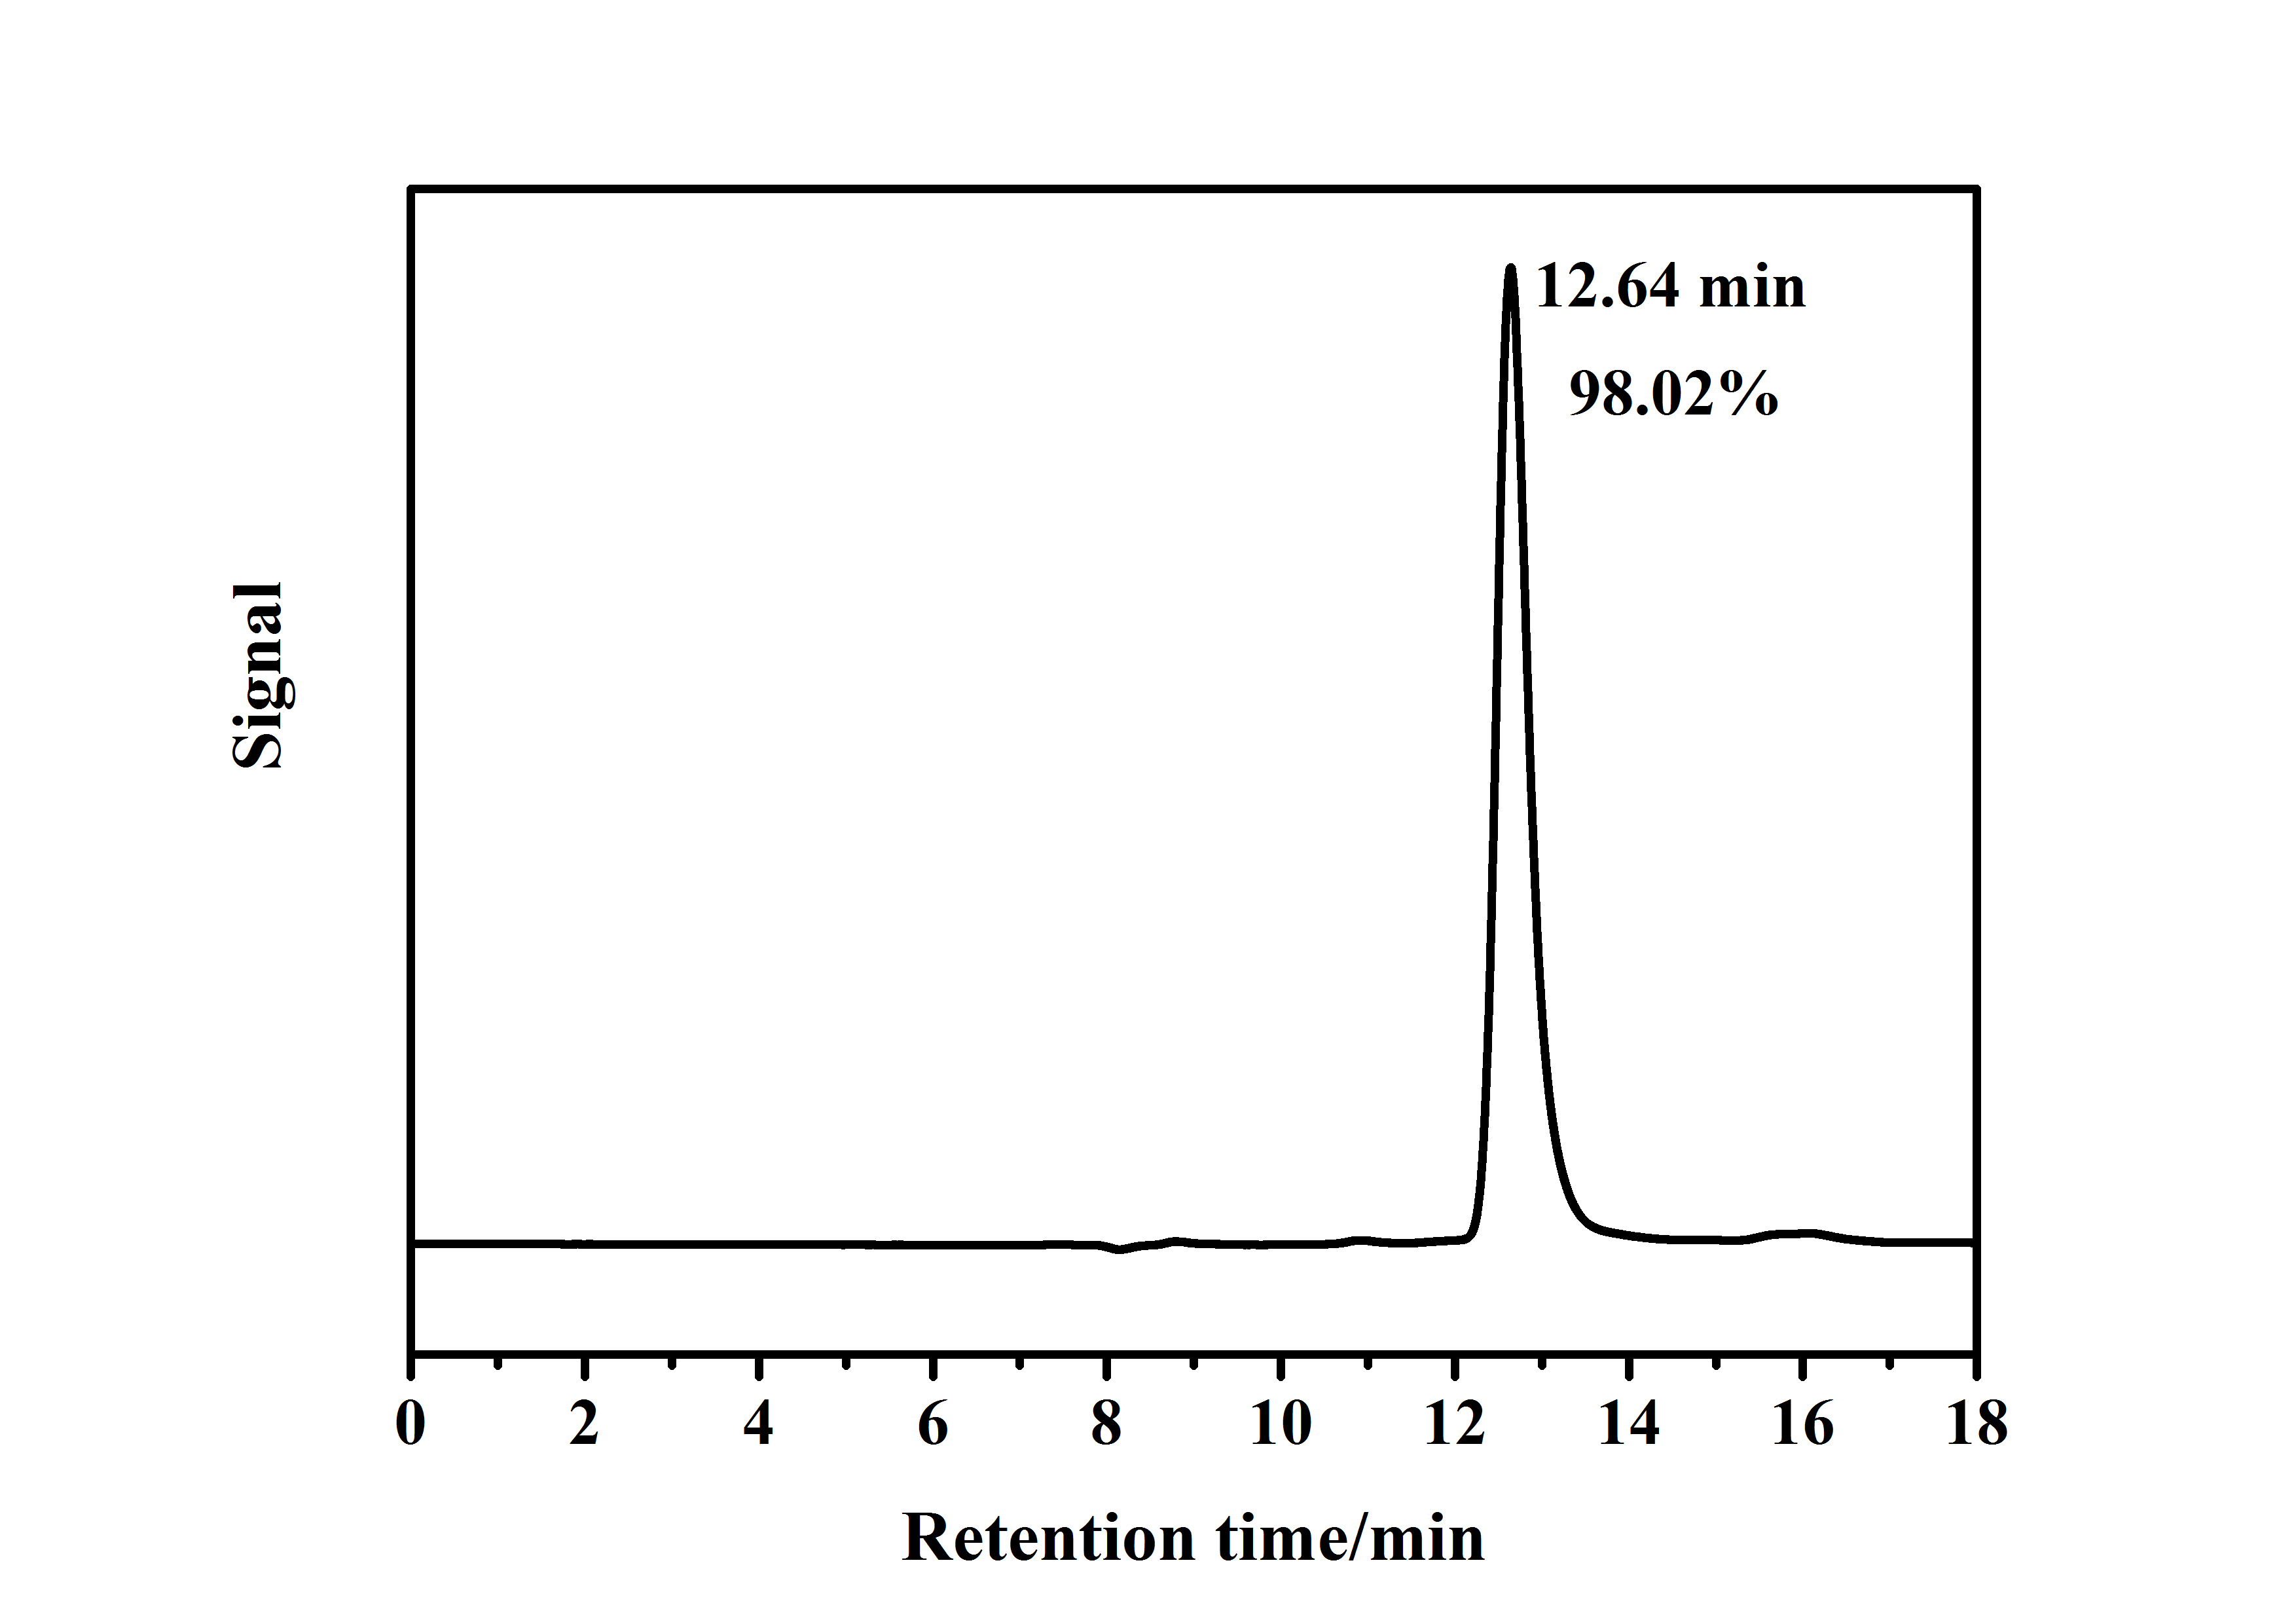


**Figure S8.** High Performance Liquid Chromatography of **2b**.

**Water contact angle measurement of films**

The contact angle test was performed by using a K100 tensiometer (Krüss Scientific Instruments). After a water drop fell to the surface of the film for 5 s, the static contact angle of films were tested.


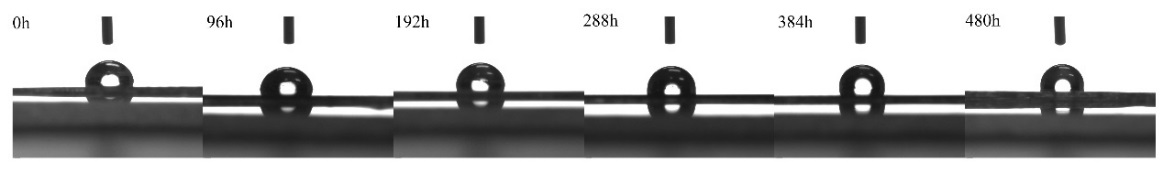


**Figure S9.** Contact angle of PS film with water


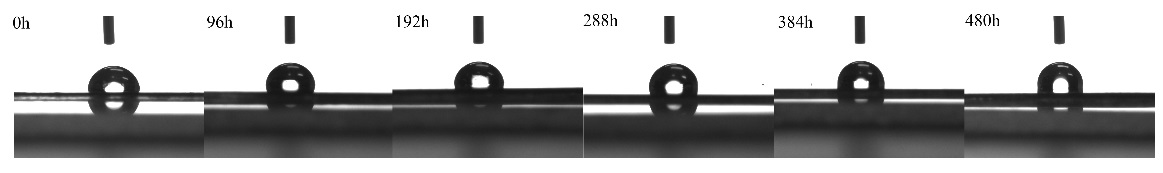


**Figure S10.** Contact angle of 0.5%C60-PS film with water


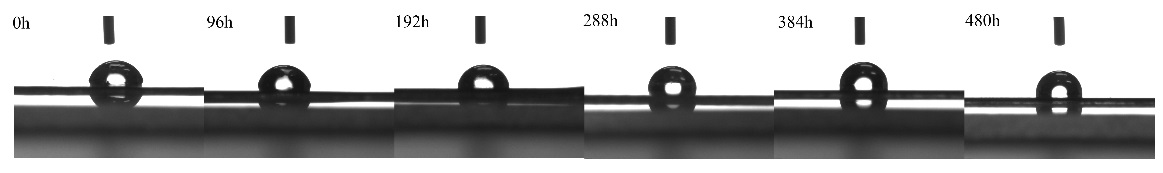


**Figure S11.** Contact angle of 0.5%**2a**-PS film with water


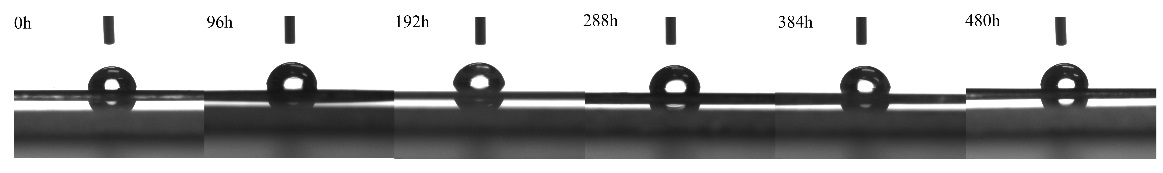


**Figure S12.** Contact angle of 0.5%**2b**-PS film with water
